# **Virological characteristics of the SARS-CoV-2 Omicron BA.2.75**

Akatsuki Saito<sup>1-3,32</sup>, Tomokazu Tamura<sup>4,32</sup>, Jiri Zahradnik<sup>5,32</sup>, Sayaka Deguchi<sup>6,32</sup>, Koshiro Tabata<sup>7,32</sup>, Izumi Kimura<sup>8,32</sup>, Jumpei Ito<sup>8,32</sup>, Hesham Nasser<sup>9,10</sup>, Mako Toyoda<sup>11</sup>, Kayoko Nagata<sup>12</sup>, Keiya Uriu<sup>8,13</sup>, Yusuke Kosugi<sup>8,13</sup>, Shigeru Fujita<sup>8,13</sup>, Daichi Yamasoba<sup>8,14</sup>, Maya Shofa<sup>1,2</sup>, MST Monira Begum<sup>9</sup>, Yoshitaka Oda<sup>15</sup>, Rigel Suzuki<sup>4</sup>, Hayato Ito<sup>4</sup>, Naganori Nao<sup>16</sup>, Lei Wang<sup>15,17</sup>, Masumi Tsuda<sup>15,17</sup>, Kumiko Yoshimatsu<sup>18</sup>, Yuki Yamamoto<sup>19</sup>, Tetsuharu Nagamoto<sup>19</sup>, Hiroyuki Asakura<sup>20</sup>, Mami Nagashima<sup>20</sup>, Kenji Sadamasu<sup>20</sup>, Kazuhisa Yoshimura<sup>20</sup>, Takamasa Ueno<sup>11</sup>, Gideon Schreiber<sup>5</sup>, Akifumi Takaori-Kondo<sup>12</sup>, The Genotype to Phenotype Japan (G2P-Japan) Consortium, Kotaro Shirakawa<sup>12</sup>, Hirofumi Sawa<sup>7,16,21</sup>, Takashi Irie<sup>22</sup>, Kazuo Takayama<sup>6,23</sup>, Keita Matsuno<sup>21,24,25</sup>, Shinya Tanaka<sup>15,17\*</sup>, Terumasa Ikeda<sup>9\*</sup>, Takasuke Fukuhara<sup>4,26\*</sup>, Kei Sato<sup>8,13,27-31,33,34\*</sup>

<sup>1</sup> Department of Veterinary Science, Faculty of Agriculture, University of Miyazaki, Miyazaki, Japan

<sup>2</sup> Graduate School of Medicine and Veterinary Medicine, University of Miyazaki, Miyazaki, Japan

<sup>3</sup> Center for Animal Disease Control, University of Miyazaki, Miyazaki, Japan

<sup>4</sup> Department of Microbiology and Immunology, Faculty of Medicine, Hokkaido University, Sapporo, Japan.

<sup>5</sup> Department of Biomolecular Sciences, Weizmann Institute of Science, Rehovot, Israel

<sup>6</sup> Center for iPS Cell Research and Application (CiRA), Kyoto University, Kyoto, Japan

<sup>7</sup> Division of Molecular Pathobiology, International Institute for Zoonosis Control, Hokkaido University, Sapporo, Japan

<sup>8</sup> Division of Systems Virology, Department of Microbiology and Immunology, The Institute of Medical Science, The University of Tokyo, Tokyo, Japan

<sup>9</sup> Division of Molecular Virology and Genetics, Joint Research Center for Human Retrovirus infection, Kumamoto University, Kumamoto, Japan

<sup>10</sup> Department of Clinical Pathology, Faculty of Medicine, Suez Canal University, Ismailia, Egypt

<sup>11</sup> Division of Infection and immunity, Joint Research Center for Human Retrovirus infection, Kumamoto University, Japan

<sup>12</sup> Department of Hematology and Oncology, Graduate School of Medicine, Kyoto University, Kyoto, Japan

<sup>13</sup> Graduate School of Medicine, The University of Tokyo, Tokyo, Japan

<sup>14</sup> Faculty of Medicine, Kobe University, Kobe, Japan

<sup>15</sup> Department of Cancer Pathology, Faculty of Medicine, Hokkaido University, Sapporo, Japan

- 42 <sup>16</sup> Division of International Research Promotion, International Institute for  
43 Zoonosis Control, Hokkaido University, Sapporo, Japan
- 44 <sup>17</sup> Institute for Chemical Reaction Design and Discovery (WPI-ICReDD),  
45 Hokkaido University, Sapporo, Japan
- 46 <sup>18</sup> Institute for Genetic Medicine, Hokkaido University, Sapporo, Japan
- 47 <sup>19</sup> HiLung Inc., Kyoto, Japan
- 48 <sup>20</sup> Tokyo Metropolitan Institute of Public Health, Tokyo, Japan
- 49 <sup>21</sup> One Health Research Center, Hokkaido University, Sapporo, Japan.
- 50 <sup>22</sup> Institute of Biomedical and Health Sciences, Hiroshima University, Hiroshima,  
51 Japan.
- 52 <sup>23</sup> AMED-CREST, Japan Agency for Medical Research and Development  
53 (AMED), Tokyo, Japan
- 54 <sup>24</sup> International Collaboration Unit, International Institute for Zoonosis Control,  
55 Hokkaido University, Sapporo, Japan
- 56 <sup>25</sup> Division of Risk Analysis and Management, International Institute for Zoonosis  
57 Control, Hokkaido University, Sapporo, Japan
- 58 <sup>26</sup> Laboratory of Virus Control, Research Institute for Microbial Diseases, Osaka  
59 University, Suita, Japan.
- 60
- 61 <sup>27</sup> International Research Center for Infectious Diseases, The Institute of Medical  
62 Science, The University of Tokyo, Tokyo, Japan
- 63 <sup>28</sup> International Vaccine Design Center, The Institute of Medical Science, The  
64 University of Tokyo, Tokyo, Japan
- 65 <sup>29</sup> Graduate School of Frontier Sciences, The University of Tokyo, Kashiwa,  
66 Japan
- 67 <sup>30</sup> Collaboration Unit for Infection, Joint Research Center for Human Retrovirus  
68 infection, Kumamoto University, Kumamoto, Japan
- 69 <sup>31</sup> CREST, Japan Science and Technology Agency, Kawaguchi, Japan
- 70 <sup>32</sup> These authors contributed equally
- 71 <sup>33</sup> Twitter: @SystemsVirology
- 72 <sup>34</sup> Lead Contact
- 73
- 74 \*Corresponding authors:  
75 tanaka@med.hokudai.ac.jp (Shinya Tanaka),  
76 ikedat@kumamoto-u.ac.jp (Terumasa Ikeda),  
77 fukut@pop.med.hokudai.ac.jp (Takasuke Fukuhara),  
78 KeiSato@g.ecc.u-tokyo.ac.jp (Kei Sato)
- 79
- 80 **Conflict of interest:** Yuki Yamamoto and Tetsuharu Nagamoto are founders  
81 and shareholders of HiLung, Inc. Yuki Yamamoto is a co-inventor of patents  
82 (PCT/JP2016/057254; "Method for inducing differentiation of alveolar epithelial

83 cells", PCT/JP2016/059786, "Method of producing airway epithelial cells"). The  
84 other authors declare that no competing interests exist.

85

86 **Short title:** Characteristics of SARS-CoV-2 BA.2.75 (37/50 characters)

87 **Keywords:** SARS-CoV-2; COVID-19; Omicron; BA.2.75; transmissibility;  
88 immune resistance; antiviral drug resistance; pathogenicity

89 **Abstract** (150/150 words)

90 SARS-CoV-2 Omicron BA.2.75 emerged in May 2022. BA.2.75 is a BA.2  
 91 descendant but is phylogenetically different from BA.5, the currently  
 92 predominant BA.2 descendant. Here, we showed that the effective reproduction  
 93 number of BA.2.75 is greater than that of BA.5. While the sensitivity of BA.2.75  
 94 to vaccination- and BA.1/2 breakthrough infection-induced humoral immunity  
 95 was comparable to that of BA.2, the immunogenicity of BA.2.75 was different  
 96 from that of BA.2 and BA.5. Three clinically-available antiviral drugs were  
 97 effective against BA.2.75. BA.2.75 spike exhibited a profound higher affinity to  
 98 human ACE2 than BA.2 and BA.5 spikes. The fusogenicity, growth efficiency in  
 99 human alveolar epithelial cells, and intrinsic pathogenicity in hamsters of  
 100 BA.2.75 were comparable to those of BA.5 but were greater than those of BA.2.  
 101 Our multiscale investigations suggest that BA.2.75 acquired virological  
 102 properties independently of BA.5, and the potential risk of BA.2.75 to global  
 103 health is greater than that of BA.5.

# 104 Introduction

105 By the end of 2021, five SARS-CoV-2 variants-of-concern (VOCs) were  
 106 classified by the WHO (WHO, 2022). These are the Alpha [also known as  
 107 lineage B.1.1.7 based on the PANGO classification (<https://cov-lineages.org>);  
 108 clade 20I based on the Nextstrain classification (<https://nextstrain.org>)], Beta  
 109 (lineage B.1.351; clade 20H), Gamma (lineage P.1; clade 20J), Delta (lineages  
 110 B.1.617.2 and AY; clades 21I and 21J), and Omicron (lineages B.1.1.529 and  
 111 BA; clade 21K) variants. Since these five VOCs are phylogenetically unrelated to  
 112 each other, SARS-CoV-2 evolution until the end of 2021 was posed by the  
 113 antigenic shift. At the beginning of 2022, Omicron BA.1 variant (clade 21K)  
 114 outcompeted the other variants and spread globally. Thereafter, BA.2 (clade  
 115 21L) and BA.4/5 (clades 22A and 22B) continuously emerged from South Africa,  
 116 while BA.2.12.1 (clade 22C) emerged in the USA. As of the beginning of August  
 117 2022, Omicron BA.5 (clade 22B) is the most predominant SARS-CoV-2 variant  
 118 in the world. In contrast to the five VOCs detected in 2021, the Omicron  
 119 subvariants are phylogenetically related. Therefore, the evolution of  
 120 SARS-CoV-2 Omicron subvariants since the end of 2021 is posed by the  
 121 antigenic drift.

122 Newly emerging SARS-CoV-2 variants need to be carefully and rapidly  
 123 assessed for a potential increase in their growth efficiency in the human  
 124 population [i.e., relative effective reproduction number ( $R_e$ )], their evasion from  
 125 antiviral immunity, and their pathogenicity. Resistance to antiviral humoral  
 126 immunity can be mainly determined by substitutions in the spike (S) protein. For  
 127 instance, Omicron BA.1 (Cao et al., 2021; Cele et al., 2021; Dejnirattisai et al.,  
 128 2022; Garcia-Beltran et al., 2021; Liu et al., 2021; Meng et al., 2022; Planas et  
 129 al., 2021; Takashita et al., 2022a; VanBlargan et al., 2022) , BA.2 (Bruel et al.,  
 130 2022; Takashita et al., 2022b; Yamasoba et al., 2022c), and BA.5 (Arora et al.,  
 131 2022; Cao et al., 2022; Gruell et al., 2022; Hachmann et al., 2022; Khan et al.,  
 132 2022; Kimura et al., 2022c; Lyke et al., 2022; Qu et al., 2022; Tuekprakhon et al.,  
 133 2022; Wang et al., 2022; Yamasoba et al., 2022c) exhibit profound resistance to  
 134 neutralizing antibodies induced by vaccination, natural SARS-CoV-2 infection,  
 135 and therapeutic monoclonal antibodies. Particularly, newly spreading  
 136 SARS-CoV-2 variants tend to be resistant to the humoral immunity induced by  
 137 the infection with prior variant; for instance, BA.2 is resistant to BA.1  
 138 breakthrough infection sera (Qu et al., 2022; Tuekprakhon et al., 2022;  
 139 Yamasoba et al., 2022b), and BA.5 is resistant to BA.2 breakthrough infection  
 140 sera (Hachmann et al., 2022; Kimura et al., 2022c; Wang et al., 2022). Therefore,  
 141 acquiring immune resistance to previously dominant variant is a key factor in  
 142 outcompeting previous variants, thereby obtaining relatively increased  $R_e$   
 143 compared to the previously dominant variant. Viral pathogenicity is also closely  
 144 associated with the phenotype of viral S protein. Particularly, we have proposed

145 that the fusogenicity of viral S protein in *in vitro* cell cultures is associated with  
146 viral pathogenicity *in vivo* (Kimura *et al.*, 2022c; Saito *et al.*, 2022; Suzuki *et al.*,  
147 2022; Yamasoba *et al.*, 2022b).

148 As mentioned above, major SARS-CoV-2 phenotypes can be defined  
149 by the function of the viral S protein. SARS-CoV-2 S protein bears two major  
150 domains, receptor binding domain (RBD) and N-terminal domain (NTD)  
151 [reviewed in (Harvey *et al.*, 2021; Mittal *et al.*, 2022)]. RBD is crucial for the  
152 binding to human angiotensin-converting enzyme 2 (ACE2) receptor for the cell  
153 attachment and entry, and therefore, this domain has been considered a major  
154 target for neutralizing antibodies to block viral infection [reviewed in (Barnes *et al.*, 2020; Harvey *et al.*, 2021; Jackson *et al.*, 2022)]. On the other hand, NTD is  
155 an immunodominant domain that can be recognized by antibodies, and some  
156 antibodies targeting NTD potentially neutralize viral infection (Cerutti *et al.*, 2021;  
157 Chi *et al.*, 2020; Liu *et al.*, 2020; Lok, 2021; McCallum *et al.*, 2021; Suryadevara  
158 *et al.*, 2021; Voss *et al.*, 2021), despite our limited understanding of its virological  
160 function.

161 The Omicron BA.2.75 variant, a new BA.2 subvariant, was first  
162 detected in India in May 2022 (WHO, 2022). Because an early preliminary  
163 investigation suggested the potential increase in the relative  $R_e$  value of BA.2.75  
164 compared to BA.5 and the original BA.2 (GitHub, 2022), BA.2.75 has been  
165 flagged as the most concerning variant that can potentially outcompete BA.5 and  
166 be the next predominant variant in the future. In fact, on July 19, 2022, the WHO  
167 classified this variant as a VOC lineage under monitoring (VOC-LUM) together  
168 with the other BA.2 subvariants, including BA.5, which bear the substitution at  
169 the L452 residue in their S proteins (WHO, 2022). On July 23, 2022, Nextstrain  
170 (<https://nextstrain.org>) classified BA.2.75 as a new clade, 22D. Compared to the  
171 BA.2 S, BA.4/5 bears four mutations in its S protein (Kimura *et al.*, 2022c;  
172 Yamasoba *et al.*, 2022b). On the other hand, the majority of BA.2.75 S bears  
173 nine mutations: K147E, W152R, F157L, I210V, and G257S substitutions are  
174 located in the NTD, while D339H, G446S, N460K, and R493Q substitutions are  
175 located in the RBD. The mutation number in the BA.2.75 S is larger than that in  
176 the BA.4/5 S, and notably, some of the substitutions detected in the BA.2.75 S  
177 show the signs of convergent evolution (Zahradnik *et al.*, 2022). These notions  
178 raise the possibility that the phenotype of BA.2.75 S is critically different from  
179 previous BA.2 subvariants. In fact, we have recently revealed that the S protein  
180 of BA.2.75 exhibits different sensitivity towards several therapeutic monoclonal  
181 antibodies from those of BA.2 and BA.5 (Yamasoba *et al.*, 2022a). However, the  
182 virological phenotype of BA.2.75, including its  $R_e$ , potential evasion from antiviral  
183 humoral immunity, sensitivity to currently recommended antiviral small  
184 compounds, virological properties of its S protein, and intrinsic pathogenicity

185 remains unclear. Here, we elucidate the features of newly emerging  
186 SARS-CoV-2 Omicron BA.2.75 subvariant.



# 187 Results

## 188 Epidemics of BA.2.75 in India

189 As of the beginning of August 2022, the Omicron BA.5 variant is predominant in  
190 the world and is outcompeting the BA.2 variant. However, a novel BA.2  
191 subvariant, BA.2.75, emerged and rapidly spread in India since May 2022.  
192 Although BA.2.75 and BA.5 (and BA.4) belong to the BA.2 subvariant clade,  
193 BA.2.75 is phylogenetically distinct from the BA.4/5 clade (**Figure 1A**).  
194 Compared to BA.2, BA.2.75 harbors 14 amino acid substitutions, including nine  
195 substitutions in the S protein (**Figures 1B and S1A**). Of these, only one  
196 revertant mutation (S:R493Q) is shared with BA.5. In India, BA.5 and BA.2.75  
197 spread in different regions each other: BA.5 spreads in the south part including  
198 Tamil Nadu and Telangana states, while BA.2.75 spreads the other parts  
199 including Himachal Pradesh, Odisha, Haryana, Rajasthan, and Maharashtra  
200 states (**Figures 1C and 1D**). To compare the relative  $R_e$  between BA.5 and  
201 BA.2.75 in India with adjusting the regional differences, we constructed a  
202 Bayesian hierarchical model that can estimate both state-specific  $R_e$  values and  
203 the value averaged in India (**Figures 1E and S1B and Table S1**). The  $R_e$  value  
204 of BA.5 is 1.19-fold higher than that of BA.2 [95% credible interval (CI):  
205 1.14–1.24] on average in India (**Figure 1E**). This value is comparative to the  
206 relative  $R_e$  value of BA.5 in South Africa (1.21) estimated in our recent study  
207 (Kimura *et al.*, 2022c). Of note, the  $R_e$  value of BA.2.75 is 1.34-fold higher than  
208 that of BA.2 (95% CI: 1.29–1.38), and the  $R_e$  value of BA.2.75 is 1.13-fold higher  
209 than that of BA.5 (95% CI: 1.06–1.20) (**Figures 1E and S1C**). Furthermore, in  
210 the Indian states analyzed, where both BA.5 and BA.2.75 are dominant, such as  
211 Telangana and Tamil Nadu (for BA. 5-dominant states) and Odisha, Haryana,  
212 Rajasthan, and Maharashtra (for BA.2.75-dominant states), the  $R_e$  value of  
213 BA.2.75 was greater than that of BA.5 (**Figures S1B and S1C**). Together, our  
214 data suggest that BA.2.75 bears the potential to spread more rapidly than BA.5  
215 and will be predominant in some regions including India in the near future.

## 217 Sensitivity of BA.2.75 to antiviral humoral immunity and antiviral drugs

218 Recent studies, including ours, showed that newly emerging Omicron  
219 subvariants such as BA.5 exhibit higher resistance to the humoral immunity  
220 induced by vaccination and natural infections with prior SARS-CoV-2 variants  
221 including BA.1 and BA.2 (Hachmann *et al.*, 2022; Kimura *et al.*, 2022c; Wang *et al.*, 2022). Additionally, we have recently demonstrated that BA.2.75 is more  
222 resistant to a therapeutic monoclonal antibody, bebtelovimab, compared to BA.2  
223 and BA.5 (Yamasoba *et al.*, 2022a). To investigate the sensitivity of BA.2.75 to  
224 antiviral humoral immunity, we prepared pseudoviruses bearing the S proteins of  
225 D614G-bearing ancestral B.1.1, BA.2, BA.5 and BA.2.75. Human sera were  
226 collected from vaccinated and infected individuals (listed in **Table S2**). The  
227



228 2-dose vaccine sera were ineffective against all Omicron subvariants tested,  
229 including BA.2.75 (**Figure 2A**). Although BA.5 was significantly more resistant to  
230 3-dose vaccine sera than BA.2, which is consistent with previous studies  
231 (Hachmann *et al.*, 2022; Kimura *et al.*, 2022c; Wang *et al.*, 2022), the sensitivity  
232 of BA.2.75 to these sera was comparable to that of BA.2 (**Figures 2B and 2C**).  
233 We then assessed the sensitivity of BA.2.75 to the convalescent sera from  
234 individuals who were infected with BA.1 and BA.2 after 2-dose or 3-dose  
235 vaccination (i.e., breakthrough infection). Similar to the previous reports  
236 including ours (Hachmann *et al.*, 2022; Kimura *et al.*, 2022c; Wang *et al.*, 2022),  
237 BA.5 exhibited significant resistance to breakthrough infection sera compared to  
238 BA.2, while the sensitivity of BA.2.75 to these sera was comparable to that of  
239 BA.2 (**Figures 2D and 2E**). These results suggest that BA.2.75 is not resistant  
240 to the humoral immunity induced by vaccination and the infection with prior  
241 Omicron subvariants including BA.1 and BA.2. Since the Delta variant emerged  
242 and caused a huge surge of infection in India in the middle of 2021 (Mlcochova  
243 *et al.*, 2021), it is hypothesized that BA.2.75 evades the immunity induced by  
244 Delta. To address this possibility, we used Delta infection sera. However, the  
245 sensitivity of all Omicron subvariants tested, including BA.2.75, to Delta infection  
246 sera was similar (**Figure 2F**), implying that previous Delta infection is not  
247 associated with the emergence of BA.2.75 in India.

248 To further address the difference in immunogenicity among Omicron  
249 subvariants, we used the sera obtained from infected hamsters at 16 days  
250 postinfection (d.p.i., i.e., after recovery) (Kimura *et al.*, 2022c; Suzuki *et al.*,  
251 2022; Yamasoba *et al.*, 2022b). While BA.1 infection hamster sera were  
252 ineffective against BA.2, BA.5 and BA.2.75 (**Figure 2G**), both BA.5 (17-fold,  
253  $P=0.031$  by Wilcoxon signed-rank test) and BA.2.75 (23-fold,  $P=0.031$  by  
254 Wilcoxon signed-rank test) exhibited significant resistance to BA.2 infection  
255 hamster sera than BA.2 (**Figure 2H**). These results suggest that the  
256 immunogenicity of BA.5 and BA.2.75 is different from BA.2. Notably, BA.2  
257 (5.1-fold,  $P=0.031$  by Wilcoxon signed-rank test) and BA.2.75 (12-fold,  $P=0.031$   
258 by Wilcoxon signed-rank test) exhibited significant resistance to BA.5 infection  
259 hamster sera (**Figure 2I**). These results suggest that the immunogenicity of BA.5  
260 and BA.2.75 is also different. To identify the substitutions responsible for the  
261 different immunogenicity of BA.2.75 S from BA.2 S and BA.5 S, we prepared the  
262 BA.2 S-based derivatives that bear respective BA.2.75 substitutions. The  
263 neutralization assay using BA.2-infected hamster sera showed that the G446S  
264 and R493Q substitutions contribute to the resistance of BA.2.75 to BA.2-induced  
265 immunity (**Figure 2H**). Because the R493Q substitution is shared with BA.5  
266 (**Figures 1B and S1A**), it can be suggested that this substitution contributes to  
267 the resistance of BA.5 to BA.2-induced immunity (**Figure 2H**). In the case of  
268 BA.5-infected hamster sera, multiple substitutions, including the K147E, W152R,

269 F157L, I210V, G446S and N460K, associated with the resistance of BA.2.75 to  
270 BA.5-induced immunity (**Figure 2I**).

271 To evaluate the sensitivity of BA.2.75 to three antiviral drugs,  
272 Remdesivir, EIDD-1931 (an active metabolite of Molnupiravir) and Nirmatrelvir  
273 (also known as PF-07321332), we used a clinical isolate of BA.2.75 (strain  
274 TY41-716; GISAID ID: EPI\_ISL\_13969765). As controls, we also used clinical  
275 isolates of B.1.1 (strain TKYE610670; GISAID ID: EPI\_ISL\_479681) (Suzuki *et al.*,  
276 2022), BA.2 (strain TY40-385; GISAID ID: EPI\_ISL\_9595859) (Kimura *et al.*,  
277 2022c), BA.5 (strain TKYS14631; GISAID ID: EPI\_ISL\_12812500) (Tamura *et al.*,  
278 2022). These viruses were inoculated into human airway organoids (AO), a  
279 physiologically relevant model (Sano *et al.*, 2022), and treated with three  
280 antiviral drugs. As shown in **Table 1** and **Figure S2A**, Remdesivir had a stronger  
281 antiviral effect ( $EC_{50}=0.63 \mu M$ ) against B.2.75 than other variants, B.1.1, BA.2  
282 and BA.5. EIDD-1931 inhibited BA.2 and BA.2.75 ( $EC_{50}=0.02 \mu M$  and  $0.08 \mu M$ ,  
283 respectively) more potently than B.1.1 and BA.5 ( $EC_{50}=0.24 \mu M$  and  $0.21 \mu M$ ,  
284 respectively). For Nirmatrelvir, no differences in antiviral efficacy were observed  
285 between four variants ( $EC_{50}=0.84 \mu M$ ,  $0.85 \mu M$ ,  $0.63 \mu M$  and  $0.81 \mu M$  for B.1.1,  
286 BA.2, BA.5 and BA.2.75, respectively). Altogether, it is suggested that all three  
287 drugs exhibit antiviral effects against BA.2.75, and particularly, EIDD-1931 is  
288 effective against BA.2.75.

289

## 290 **Virological characteristics of BA.2.75 S *in vitro***

291 To investigate the virological properties of BA.2.75 S, we measured the  
292 pseudovirus infectivity. As shown in **Figure 3A**, the pseudovirus infectivity of  
293 BA.2.75 was significantly (12.5-fold) higher than that of BA.2. To assess the  
294 association of TMPRSS2 usage with the increased pseudovirus infectivity of  
295 BA.2.75, we used both HEK293-ACE2/TMPRSS2 cells and HEK293-ACE2 cells,  
296 on which endogenous surface TMPRSS2 is undetectable (Yamasoba *et al.*,  
297 2022b), as target cells. Consistent with our recent study (Kimura *et al.*, 2022c),  
298 the fold increase in pseudovirus infectivity of BA.5 caused by TMPRSS2  
299 expression on the target cells was not observed (**Figure S3A**). Similarly, the  
300 infectivity of BA.2.75 pseudovirus was not increased by TMPRSS2 expression  
301 (**Figure S3A**), suggesting that TMPRSS2 is not associated with an increase in  
302 pseudovirus infectivity of BA.2.75. To determine the substitutions that are  
303 responsible for the increased pseudovirus infectivity of BA.2.75, we used a  
304 series of BA.2 derivatives that bears the BA.2.75-specific substitutions. Three  
305 substitutions in the NTD, K147E, F157L, and I210V, and two substitutions in the  
306 RBD, N460K and R493Q, significantly increased infectivity (**Figure 3A**). Notably,  
307 the N460K substitution increased infectivity by 44-fold (**Figure 3A**). On the other  
308 hand, a substitution in the NTD, W152R, significantly (8.9-fold) decreased  
309 infectivity (**Figure 3A**). The BA.2 derivative bearing the three substitutions in the

310 NTD in close proximity to each other, K147E, W152R and F157L, exhibited  
311 comparable infectivity to BA.2 (**Figure 3A**).

312 To decipher the binding properties of BA.2.75 S RBD to human ACE2  
313 and the role of each substitution, we measured the ACE2 binding affinity of the S  
314 RBDs of BA.2.75 as well as those of BA.2 derivatives bearing D339H, G446S,  
315 N460K and R493Q substitutions by an enhanced surface display system  
316 (Zahradnik et al., 2021a). Intriguingly, the BA.2.75 S RBD showed a strongly  
317 tight binding with  $146 \pm 6$  pM affinity (**Figure 3B**). Out of the four BA.2-based  
318 derivatives, only the BA.2 N460K substitution exhibited a significantly increased  
319 binding affinity than BA.2 (**Figure 3B**). Consistent with the results of pseudovirus  
320 assay (**Figure 3A**), these observations suggest that the N460K substitution is  
321 critical to characterize the virological phenotype of BA.2.75 S. To reveal the  
322 structural effect of the N460K substitution, we generated a structural model of  
323 BA.2.75 S RBD using AlphaFold2 (Mirdita et al., 2022). Calculating the  
324 electrostatic potential of this model in comparison with the S RBDs of B.1.1 and  
325 BA.2 showed that K460 of BA.2.75 S RBD is positively charged (**Figure 3C**),  
326 and the K460 is complementary to the negative charged binding site on human  
327 ACE2 (**Figure 3D**). These structural observations suggest that N460K  
328 substitution contributes to increased electrostatic complementary binding  
329 between the BA.2.75 S RBD and human ACE2.

330 Although the N460K substitution significantly increased binding affinity  
331 (**Figure 3B**), the binding affinity of the BA.2 N460K was still 5-fold lower than  
332 that of BA.2.75 (**Figure 3B**). Therefore, the extraordinary tight binding of  
333 BA.2.75 cannot be explained by the N460K alone, and it is hypothesized that the  
334 additional substitutions conferred negative effects in the BA.2 background. In  
335 particular, the D339H substitution requires two nucleotide changes in the codon  
336 to occur. Such changes are still relatively rare in the evolution of SARS-CoV-2,  
337 reinforcing the importance and corresponding fitness advantage. To analyze the  
338 potential impact of this substitution, we additionally prepared the BA.2.75 H339D  
339 derivative and measured its affinity. The  $K_D$  value of this mutant was significantly  
340 (3-fold) lower than that of the parental BA.2.75 (**Figure 3B**). The structural model  
341 computed by AlphaFold2 (Mirdita et al., 2022) suggested that the loss of  
342 ion-dipole interaction between the D339 and the N343 allowed for the N343 side  
343 chain repositioning (**Figure S3B**). These data suggest that the D339H  
344 substitution potentially influences the position of the linoleic acid binding loop  
345 between residues 367–378 (Toelzer et al., 2020) and thereby increases binding  
346 affinity to ACE2.

347 To further reveal the virological property of BA.2.75 S, we performed a  
348 cell-based fusion assay (Kimura et al., 2022b; Kimura et al., 2022c; Motozono et  
349 al., 2021; Saito et al., 2022; Suzuki et al., 2022; Yamasoba et al., 2022b) using  
350 Calu-3 cells as target cells. Flow cytometry analysis showed that the surface

expression level of BA.2.75 is comparable to that of BA.2 (**Figure 3E**). Consistent with our recent study (Kimura *et al.*, 2022c), the fusogenicity of BA.5 was significantly higher than that of BA.2, and notably, the BA.2.75 S was also significantly more fusogenic than the BA.2 S (**Figure 3F**). Altogether, these results suggest that BA.2.75 S exhibits higher binding affinity to human ACE2 and higher fusogenicity.

### **Virological characteristics of BA.2.75 clinical isolate *in vitro***

To evaluate the growth capacity of BA.2.75, a clinical isolate of BA.2.75 (strain TY41-716; GISAID ID: EPI\_ISL\_13969765) was inoculated in a variety of *in vitro* cell culture systems. As controls, we also used clinical isolates of B.1.1 (strain TKYE610670; GISAID ID: EPI\_ISL\_479681) (Suzuki *et al.*, 2022), Delta (B.1.617.2, strain TKYTK1734; GISAID ID: EPI\_ISL\_2378732) (Saito *et al.*, 2022), BA.2 (strain TY40-385; GISAID ID: EPI\_ISL\_9595859) (Kimura *et al.*, 2022c) and BA.5 (strain TKYS14631; GISAID ID: EPI\_ISL\_12812500) (Tamura *et al.*, 2022). The growth efficacy of B.1.1 and Delta was significantly higher than that of BA.2 in Vero cells (**Figure 4A**), VeroE6/TMPRSS2 cells (**Figure 4B**), HEK293-ACE2/TMPRSS2 cells (**Figure 4C**), AO-derived air-liquid interface (AO-ALI) model (**Figure 4D**), human iPSC cell (iPSC)-derived airway epithelial cells (**Figure 4E**) and lung epithelial cells (**Figure 4F**). BA.5 replicated more efficiently than BA.2 with statistically significant differences in the five cell culture systems except AO-ALI (**Figures 4A–4F**). The growth efficacy of BA.2.75 was significantly higher than that of BA.2 in Vero cells (**Figure 4A**), VeroE6/TMPRSS2 cells (**Figure 4B**), HEK293-ACE2/TMPRSS2 cells (**Figure 4C**), and iPSC-derived lung epithelial cells (**Figure 4F**), while the growth efficacy of BA.2.75 and BA.2 were comparable in the two airway epithelial cell systems (**Figures 4D and 4E**).

To evaluate the effect of BA.2.75 on the airway epithelial and endothelial barriers, airway-on-a-chips (**Figure S3C**) were used. By measuring the amount of virus that invades from the top channel (airway channel; **Figure 4G**) to the bottom channel (blood vessel channel; **Figure 4H**), the ability of viruses to disrupt the airway epithelial and endothelial barriers can be evaluated. Notably, the amount of virus that invades to the blood vessel channel of BA.2.75-, BA.5- and B.1.1-infected airway-on-chips was significantly higher than that of BA.2-infected one (**Figure 4I**). These results suggest that BA.2.75 exhibits more severe airway epithelial and endothelial barrier disruption than BA.2.

To further address the fusogenic capacity of BA.2.75, we performed plaque assay using VeroE6/TMPRSS2 cells. Consistent with our previous studies using a Delta isolate (Saito *et al.*, 2022) as well as the recombinant SARS-CoV-2 bearing the B.1.1 S (Yamasoba *et al.*, 2022a), BA.2 S (Yamasoba



*et al.*, 2022a), and BA.5 S (Kimura *et al.*, 2022c), the plaques formed by the infections of clinical isolates of B.1.1, Delta and BA.5 were significantly bigger than those formed by the infection of BA.2 (**Figure 4J**). Notably, BA.2.75 infection also showed significantly bigger plaques than BA.2 infection (**Figure 4J**). Together with the results of cell-based fusion assay (**Figure 3F**) and airway-on-a-chip infection experiments (**Figures 4G–4I**), these observations suggest that BA.2.75 is more fusogenic than BA.2, and the fusogenicity of BA.2.75 is comparable to that of BA.5.

#### **Virological characteristics of BA.2.75 *in vivo***

As we proposed in our prior studies (Kimura *et al.*, 2022c; Saito *et al.*, 2022; Suzuki *et al.*, 2022; Yamasoba *et al.*, 2022b), the fusogenicity of the S proteins of SARS-CoV-2 variants is closely associated with the intrinsic pathogenicity in an experimental hamster model. Here we revealed that both BA.5 and BA.2.75 are more fusogenic than BA.2 in the *in vitro* cell culture systems (**Figures 3 and 4**). Given that the recombinant SARS-CoV-2 bearing the BA.5 S (Kimura *et al.*, 2022c) as well as a clinical isolate of BA.5 (Tamura *et al.*, 2022) exhibited relatively higher pathogenicity than BA.2 in hamsters, it is hypothesized that BA.2.75 is also intrinsically more pathogenic than BA.2. To address this possibility, we intranasally inoculated a BA.2.75 isolate into hamsters. As controls, we also used clinical isolates of Delta, BA.2 and BA.5. While we followed our established experimental protocol (Kimura *et al.*, 2022c; Saito *et al.*, 2022; Suzuki *et al.*, 2022; Yamasoba *et al.*, 2022b), the viral titers of clinical isolates of Omicron subvariants were relatively low. Therefore, we set out to conduct animal experiments in this study with relatively lower titer inoculum (1,000 TCID<sub>50</sub> per hamster) than our previous studies (10,000 TCID<sub>50</sub> per hamster) (Kimura *et al.*, 2022c; Saito *et al.*, 2022; Suzuki *et al.*, 2022; Yamasoba *et al.*, 2022b). Nevertheless, consistent with our previous study (Saito *et al.*, 2022), the Delta infection exhibited the most severe weight changes among the five groups (**Figure 5A**). While the body weight of BA.2-infected hamsters was similar to that of uninfected hamsters, those of BA.5- and BA.2.75-infected hamsters were significantly lower than that of uninfected hamsters (**Figure 5A**).

We then quantitatively analyzed the pulmonary function of infected hamsters as reflected by three parameters, enhanced pause (Penh), the ratio of time to peak expiratory flow relative to the total expiratory time (Rpef), and breath per minute (BPM), which are surrogate markers for bronchoconstriction or airway obstruction. Subcutaneous oxygen saturation (SpO<sub>2</sub>) was also routinely measured. Although the SpO<sub>2</sub> values were comparable among the five groups, Delta infection resulted in significant differences in the other three respiratory parameters compared to BA.2 (**Figure 5A**), suggesting that Delta is more pathogenic than BA.2. There were no differences in the values of Penh,

433 Rpef and BPM between BA.5 and BA.2, and the values of Penh and Rpef of  
434 BA.2.75-infected hamsters were comparable to those of BA.2 (**Figure 5A**).  
435 However, the BPM value of BA.2.75 was significantly lower than that of BA.2  
436 (**Figure 5A**), suggesting that BA.2.75 is slightly more pathogenic than BA.2.

437 To address the viral spread in infected hamsters, we routinely  
438 measured the viral RNA load in the oral swab. Although the viral RNA loads of  
439 the hamsters infected with Delta, BA.2 and BA.5 were comparable, the viral load  
440 in the swabs of BA.2.75-infected hamsters was relatively highly maintained by 7  
441 d.p.i. and was significantly higher than that of BA.2-infected hamsters (**Figure**  
442 **5B**). To address the possibility that BA.2.75 more efficiently spread in the  
443 respiratory tissues, we collected the lungs of infected hamsters at 2 and 5 d.p.i.,  
444 and the collected tissues were separated into the hilum and periphery regions.  
445 Although the viral RNA loads in both the hilum and periphery of four infection  
446 groups were comparable at 2 d.p.i. (**Figure 5C, top**), those of the hamsters  
447 infected with Delta, BA.5 and BA.2.75 were significantly higher than those  
448 infected with BA.2 at 5 d.p.i. (**Figure 5C, bottom**).

449 To further address the virus spread in the respiratory tissues,  
450 immunohistochemical (IHC) analysis targeting viral nucleocapsid (N) protein was  
451 conducted. Similar to our previous studies (Kimura *et al.*, 2022c; Suzuki *et al.*,  
452 2022; Yamasoba *et al.*, 2022b), epithelial cells in the upper tracheae of infected  
453 hamsters were sporadically positive for viral N protein at 2 d.p.i., but there were  
454 no significant differences among four viruses including BA.2.75 (**Figure S4A**). In  
455 the alveolar space around the bronchi/bronchioles at 2 d.p.i., the N-positive cells  
456 were detected in Delta-infected hamsters. On the other hand, the N proteins  
457 strongly remained in the lobar bronchi in BA.5- and BA.2.75-infected hamsters  
458 (**Figures 5D, top, and S4B**). While few N-positive cells were detected in the  
459 alveolar space of BA.2- and BA.5-infected hamsters, it was notable that the N  
460 positivity spread into the alveolar space in BA.2.75-infected hamsters (**Figures**  
461 **5D, top, and S4B**). The quantification of the N-positive area in total of four lung  
462 lobes at 2 d.p.i. (**Figure S4B**) showed that the N-positive areas of Delta- and  
463 BA.2.75-infected hamsters were significantly greater than that of BA.2-infected  
464 hamsters (**Figure 5E, top**). At 5 d.p.i., although the N-positive cells were hardly  
465 detected in the lungs infected with BA.2, a few N-positive cells were detected in  
466 the peripheral alveolar space in Delta, BA.5, BA.2.75 (**Figures 5D, bottom, and**  
467 **S4C**). The quantification of the N-positive area in the four lung lobes at 5 d.p.i.  
468 (**Figure S4C**) further showed that the N-positive areas of Delta- and BA.5- and  
469 BA.2.75-infected hamsters were significantly greater than that of BA.2-infected  
470 hamsters (**Figure 5E, bottom**). These data suggest that BA.2 targets only a  
471 portion of bronchial/bronchiolar epithelium and was less efficiently transmitted to  
472 the neighboring epithelial cells. On the other hand, BA.5 and BA.2.75 infections  
473 seemed to persist in the bronchial/bronchiolar epithelium, and particularly,

BA.2.75 invaded the alveolar space more efficiently than BA.5 at the early stage of infection. Altogether, the IHC data suggest that among Omicron subvariants, BA.2.75 more efficiently spread into the alveolar space than BA.2 and BA.5, with persistent infection in the bronchi/bronchioles.

### **Pathogenicity of BA.2.75**

To investigate the intrinsic pathogenicity of BA.2.75, the formalin-fixed right lungs of infected hamsters at 2 and 5 d.p.i. were analyzed by carefully identifying the four lobules and main bronchus and lobar bronchi sectioning each lobe along with the bronchial branches. Histopathological scoring was performed according to the criteria described in our previous studies (Kimura *et al.*, 2022c; Saito *et al.*, 2022; Suzuki *et al.*, 2022; Yamasoba *et al.*, 2022b): (i) bronchitis/bronchiolitis (an inflammatory indicator at early stage of infection), (ii) hemorrhage/congestion, (iii) alveolar damage with epithelial apoptosis and macrophage infiltration, (iv) emergence of type II pneumocytes, and (v) hyperplasia of type II pneumocytes were evaluated by certified pathologists and the degree of these pathological findings were arbitrarily scored using four-tiered system as 0 (negative), 1 (weak), 2 (moderate), and 3 (severe). Consistent with our previous studies (Saito *et al.*, 2022; Suzuki *et al.*, 2022), all five parameters as well as the total score of Delta-infected hamsters were significantly higher than those of BA.2-infected hamsters (**Figures 5F and 5G**), suggesting that Delta is more pathogenic than BA.2. When we compare the histopathological scores of Omicron subvariants, the scores indicating hemorrhage or congestion and total histology scores of BA.5 and BA.2.75 were significantly greater than those of BA.2 (**Figures 5F and 5G**). Similar to our recent studies (Kimura *et al.*, 2022c; Tamura *et al.*, 2022), BA.5 is intrinsically more pathogenic than BA.2, and notably, our results suggest that BA.2.75 exhibits more significant inflammation than BA.2. To clarify the area of pneumonia, the inflammatory area, which is mainly composed of the type II pneumocytes with some inflammatory cell types, such as neutrophils, lymphocytes, and macrophages, is termed the area of type II pneumocytes and was morphometrically analyzed (**Figure S4D**). As summarized in **Figure 5H**, at 5 d.p.i., the percentages of the area of type II pneumocytes of Delta, BA.5 and BA.2.75 were significantly higher than that of BA.2. Altogether, these findings suggest that BA.2.75 infection intrinsically induces greater inflammation and exhibits higher pathogenicity than BA.2.



## 509 Discussion

510 Here, we characterized the virological property of the Omicron BA.2.75 variant,  
511 such as the growth rate in the human population, resistance to antiviral humoral  
512 immunity and antiviral drugs, functions of S protein *in vitro*, and intrinsic  
513 pathogenicity.

514 In terms of the emergence geography and phylogeny, BA.5 and  
515 BA.2.75 emerged independently. Nevertheless, the results of cell-based fusion  
516 assay, airway-on-a-chip assay and plaque assay suggested that both BA.5 and  
517 BA.2.75 acquired higher fusogenicity after the divergence from BA.2. Our data  
518 including a recent study (Kimura *et al.*, 2022c) suggest that the critical  
519 substitution responsible for the higher fusogenicity of BA.5 and BA.2.75 S  
520 proteins are different: the L452R substitution for BA.5 S, and the D339H/N460K  
521 substitution for BA.2.75 S.

522 The higher fusogenicity attributed by the increased binding affinity of  
523 the L452R-bearing S RBD to human ACE2 was reported in previous studies  
524 focusing on the S proteins of previous SARS-CoV-2 variants including Epsilon  
525 (Motozono *et al.*, 2021), Delta (Saito *et al.*, 2022) and Omicron BA.5 (Kimura *et al.*, 2022c) variants. The prominently increased ACE2 binding affinity caused by  
526 the N460K substitution was also reported in our previous study (Zahradnik *et al.*,  
527 2021b). We also demonstrated that the D339H, which is unique in the BA.2.75 S,  
528 contributes to increased ACE2 binding affinity. Our data suggest that the N460K  
529 and D339H substitutions cooperatively determine the higher fusogenicity of  
530 BA.2.75 S. In our previous studies focusing on Delta (Saito *et al.*, 2022),  
531 Omicron BA.1 (Suzuki *et al.*, 2022), BA.2 (Yamasoba *et al.*, 2022b) and BA.5  
532 (Kimura *et al.*, 2022c), we proposed a close association between the S-mediated  
533 fusogenicity *in vitro* and the pathogenicity in a hamster model. Consistent with  
534 our hypothesis, here we demonstrated that, compared to BA.2, BA.2.75 exhibits  
535 higher fusogenicity *in vitro* and efficient viral spread in the lungs of infected  
536 hamsters, which leads to enhanced inflammation in the lung and higher  
537 pathogenicity *in vivo*. Moreover, *in vitro* experiments using a variety of cell  
538 culture systems showed that BA.2.75 replicates more efficiently than BA.2 in  
539 alveolar epithelial cells but not in airway epithelial cells. Altogether, our results  
540 suggest that BA.2.75 exhibits higher fusogenicity and pathogenicity via evolution  
541 of its S protein independently of BA.5.

542 Consistent with our previous study (Yamasoba *et al.*, 2022b),  
543 neutralization experiments showed that BA.5 was significantly more resistant to  
544 the humoral immunity induced by vaccination and breakthrough infections of  
545 prior Omicron subvariants. On the other hand, the sensitivity of BA.2.75 to these  
546 antisera was comparable to BA.2. More importantly, BA.2.75 was highly  
547 resistant to the BA.5-induced immunity. These results suggest that, although  
548 both BA.2.75 and BA.5 are descendants of BA.2, their immunogenicity is  
549

different from each other. Furthermore, compared to BA.2, the sensitivity of BA.2.75 and BA.5 to therapeutic monoclonal antibodies was also different (Yamasoba *et al.*, 2022a). The G446S was also closely associated with the resistance of BA.2.75 to the antiviral effects of BA.2- and BA.5-infected hamster sera. Because the G446S significantly decreases ACE2 affinity of S RBD, this substitution was acquired to evade antiviral immunity, and the other substitutions in RBD, particularly N460K, contributed to compensate for the decreased ACE2 binding affinity by G446S.

Another remarkable substitution pattern in the BA.2.75 S is the multiple substitutions in the S NTD. Particularly, three out of the five substitutions in the NTD (K147E, W152R and F157L) are located in a well-studied region, the NTD supersite. Previous studies showed that the mutations in the NTD supersite are responsible for the resistance to antiviral monoclonal antibodies (Cerutti *et al.*, 2021; Chi *et al.*, 2020; Liu *et al.*, 2020; Lok, 2021; McCallum *et al.*, 2021; Suryadevara *et al.*, 2021; Voss *et al.*, 2021). In fact, our results suggested that these three substitutions in the NTD supersite are closely associated with the evasion from BA.5-induced humoral immunity, in addition to the G446S in RBD. In fact, the W152 has been shown as a mutational hot spot of SARS-CoV-2 (Kubik *et al.*, 2021). Therefore, BA.2.75 might mutate this specific residue to evade neutralization by sera of convalescent or vaccinated individuals.

According to the “COVID-19 Treatment Guidelines” issued by NIH (NIH, 2022), the use of Paxlovid (Ritonavir and Nirmatrelvir), Remdesivir and Molnupiravir (a prodrug of EIDD-1931) is highly recommended as treatment of patients who do not require hospitalization or oxygen supplement. Because the evolution of SARS-CoV-2 is unpredictable, timely and accurate testing of the efficacy of currently available antiviral drugs is indispensable to treat patients infected with a new variant. Our results using physiologically relevant human AO demonstrated that BA.2.75 retained the sensitivity to major small-molecule anti-SARS-CoV-2 drugs including Remdesivir, EIDD-1931 and Nirmatrelvir. Interestingly, BA.2.75 was more sensitive to Remdesivir than other stains, and a similar tendency was observed with EIDD-1931. In terms of drug testing, previous studies addressed the antiviral activity of these drugs against BA.2 and BA.5 using immortalized cell lines such as VeroE6/TMPRSS2 cells (Takashita *et al.*, 2022c), Caco-2-F03 cells (Bojkova *et al.*, 2022) and Calu-3 cells (Carlin *et al.*, 2022) but the effects of these antiviral drugs were different each other, and these results were also different from ours (**Table 1**). In addition, a previous study demonstrated that VeroE6 cells have a low capacity to metabolize Remdesivir, leading to a weak antiviral activity (Pruijssers *et al.*, 2020). These results suggest that the experimental system significantly affects the outcome of antiviral drug efficacy, raising the importance to evaluate the efficacy of antiviral drugs using

590 physiologically relevant systems, such as organoids and organ-on-a-chip  
591 systems.

592 Our investigation using the viral genome surveillance data reported  
593 from India suggested that BA.2.75 bears the potential to outcompete BA.2 as  
594 well as BA.5, the most predominant variant in the world as of August 2022.  
595 Following the worldwide spread of BA.5, it is probable that the number of  
596 individuals infected with BA.5 will increase. Together with our findings showing  
597 the higher resistance of BA.2.75 to the BA.5-induced immunity, there appears to  
598 be sufficient plausibility that BA.2.75 evades the BA.5-induced immunity, and  
599 this property will confer this variant to more efficient spread in the countries  
600 where BA.5 has been widely spreading, such as Australia and Japan.  
601 Additionally, here we showed that the intrinsic pathogenicity of BA.2.75 in  
602 hamsters is comparable to BA.5 and higher than that of BA.2. Since a recent  
603 study showed that the hospitalization risk of BA.5 was significantly higher than  
604 that of BA.2 in the once-boosted vaccinated population (Kislaya et al., 2022), it is  
605 not unreasonable to infer that the intrinsic pathogenicity in infected hamsters  
606 reflects to the severity and outcome in infected humans to a meaningful extent.

607 In summary, our multiscale investigations revealed the growth rate in  
608 the human population, fusogenicity and intrinsic pathogenicity of BA.2.75 are  
609 greater than BA.2. These features of BA.2.75 suggests the potential risk of this  
610 variant to global health. Since BA.2.75 shows significantly higher  $R_e$  than BA.2  
611 and BA.5 in India, this variant will probably transmit to and initiate outcompeting  
612 BA.2 and BA.5 in some countries other than India in the near future. To assess  
613 the potential risk of BA.2.75 to global health, this variant should be under  
614 monitoring carefully and continuously through worldwide cooperation of in-depth  
615 viral genomic surveillance.

## 616 **STAR<sup>®</sup>METHODS**

### 617 • KEY RESOURCES TABLE

### 618 • RESOURCE AVAILABILITY

619 ○ Lead Contact

620 ○ Materials Availability

621 ○ Data and Code Availability

### 622 • EXPERIMENTAL MODEL AND SUBJECT DETAILS

623 ○ Ethics Statement

624 ○ Human serum collection

625 ○ Cell culture

### 626 • METHOD DETAILS

627 ○ Viral genome sequencing

628 ○ Phylogenetic analyses

629 ○ Modelling the epidemic dynamics of SARS-CoV-2 lineages

630 ○ Plasmid construction

631 ○ Neutralization assay

632 ○ Airway organoids

633 ○ SARS-CoV-2 preparation and titration

634 ○ Antiviral drug assay using SARS-CoV-2 clinical isolates and AO

635 ○ Cytotoxicity assay

636 ○ Pseudovirus infection

637 ○ Yeast surface display

638 ○ AlphaFold2

639 ○ SARS-CoV-2 S-based fusion assay

640 ○ AO-ALI model

641 ○ Preparation of human airway and alveolar epithelial cells from human

### 642 **iPSC**

643 ○ Airway-on-a-chips

644 ○ Microfluidic device

645 ○ SARS-CoV-2 infection

646 ○ RT-qPCR

647 ○ Plaque assay

648 ○ Animal experiments

649 ○ Lung function test

650 ○ Immunohistochemistry

651 ○ H&E staining

652 ○ Histopathological scoring

### 653 • QUANTIFICATION AND STATISTICAL ANALYSIS

### 654 **Supplemental Information**

655 Additional Supplemental Items are available upon request.

656

## 657 **Author Contributions**

658 Akatsuki Saito, Sayaka Deguchi, Izumi Kimura, Hesham Nasser, Mako Toyoda,  
 659 Kayoko Nagata, Keiya Uriu, Yusuke Kosugi, Shigeru Fujita, Daichi Yamasoba,  
 660 Maya Shofa, MST Monira Begum, Takashi Irie, Takamasa Ueno, and Terumasa  
 661 Ikeda performed cell culture experiments.  
 662 Tomokazu Tamura, Koshiro Tabata, Rigel Suzuki, Hayato Ito, Naganori Nao,  
 663 Kumiko Yoshimatsu, Hirofumi Sawa, Keita Matsuno, and Takasuke Fukuhara  
 664 performed animal experiments.  
 665 Yoshitaka Oda, Lei Wang, Masumi Tsuda, and Shinya Tanaka performed  
 666 histopathological analysis.  
 667 Jiri Zahradnik and Gideon Schreiber performed yeast surface display assay.  
 668 Jiri Zahradnik and Yusuke Kosugi performed structural analysis.  
 669 Sayaka Deguchi and Kazuo Takayama prepared AO, AO-ALI and  
 670 airway-on-a-chip systems.  
 671 Yuki Yamamoto and Tetsuharu Nagamoto performed generation and provision  
 672 of human iPSC-derived airway and alveolar epithelial cells.  
 673 Hiroyuki Asakura, Mami Nagashima, Kenji Sadamasu, Kazuhisa Yoshimura  
 674 performed viral genome sequencing analysis.  
 675 Akifumi Takaori-Kondo and Kotaro Shirakawa contributed clinical sample  
 676 collection.  
 677 Jumpei Ito performed statistical, modelling, and bioinformatics analyses.  
 678 Jumpei Ito, Kazuo Takayama, Keita Matsuno, Shinya Tanaka, Terumasa Ikeda,  
 679 Takasuke Fukuhara, and Kei Sato designed the experiments and interpreted the  
 680 results.  
 681 Jumpei Ito, Terumasa Ikeda, Takasuke Fukuhara and Kei Sato wrote the original  
 682 manuscript.  
 683 All authors reviewed and proofread the manuscript.  
 684 The Genotype to Phenotype Japan (G2P-Japan) Consortium contributed to the  
 685 project administration.

## 687 **Conflict of interest**

688 The authors declare that no competing interests exist.

## 690 **Acknowledgments**

691 We would like to thank all members belonging to The Genotype to Phenotype  
 692 Japan (G2P-Japan) Consortium. We thank Dr. Kenzo Tokunaga (National  
 693 Institute for Infectious Diseases, Japan) and Dr. Jin Gohda (The University of  
 694 Tokyo, Japan) for providing reagents. We also thank National Institute for  
 695 Infectious Diseases, Japan for providing clinical isolates of BA.2.75 (strain  
 696 TY41-716; GISAID ID: EPI\_ISL\_13969765) and BA.2 (strain TY40-385; GISAID  
 697 ID: EPI\_ISL\_9595859) and Chiba University (Motoaki Seki, Ryoji Fujiki, Atsushi

Kaneda, Tadanaga Shimada, Taka-aki Nakada, Seiichiro Sakao and Takuji Suzuki) for collecting and providing Delta infection sera. We gratefully acknowledge all data contributors, i.e. the Authors and their Originating laboratories responsible for obtaining the specimens, and their Submitting laboratories for generating the genetic sequence and metadata and sharing via the GISAID Initiative, on which this research is based. The super-computing resource was provided by Human Genome Center at The University of Tokyo.

This study was supported in part by AMED Program on R&D of new generation vaccine including new modality application (JP223fa727002, to Kei Sato); AMED Research Program on Emerging and Re-emerging Infectious Diseases (JP21fk0108574, to Hesham Nasser; JP21fk0108465, to Akatsuki Saito; JP21fk0108493, to Takasuke Fukuhara; JP22fk0108617 to Takasuke Fukuhara; JP22fk0108146, to Kei Sato; 21fk0108494 to G2P-Japan Consortium, Kotaro Shirakawa, Takashi Irie, Keita Matsuno, Shinya Tanaka, Terumasa Ikeda, Takasuke Fukuhara, and Kei Sato); AMED Research Program on HIV/AIDS (JP22fk0410033, to Akatsuki Saito; JP22fk0410047, to Akatsuki Saito; JP22fk0410055, to Terumasa Ikeda; 22fk0410034 to Akifumi Takaori-Kondo and Kotaro Shirakawa; and JP22fk0410039, to Kotaro Shirakawa and Kei Sato); AMED CRDF Global Grant (JP22jk0210039 to Akatsuki Saito); AMED Japan Program for Infectious Diseases Research and Infrastructure (JP22wm0325009, to Akatsuki Saito; JP22wm0125008 to Keita Matsuno); AMED CREST (JP22gm1610005, to Kazuo Takayama); JST CREST (JPMJCR20H4, to Kei Sato); JSPS KAKENHI Grant-in-Aid for Scientific Research C (22K07089, to Mako Toyoda; 22K07103, to Terumasa Ikeda); JSPS KAKENHI Grant-in-Aid for Scientific Research B (21H02736, to Takasuke Fukuhara); JSPS KAKENHI Grant-in-Aid for Early-Career Scientists (22K16375, to Hesham Nasser; 20K15767, Jumpei Ito); JSPS Core-to-Core Program (A. Advanced Research Networks) (JPJSCCA20190008, to Kei Sato); JSPS Research Fellow DC2 (22J11578, to Keiya Uriu); JSPS Leading Initiative for Excellent Young Researchers (LEADER) (to Terumasa Ikeda); World-leading Innovative and Smart Education (WISE) Program 1801 from the Ministry of Education, Culture, Sports, Science and Technology (MEXT) (to Naganori Nao); The Tokyo Biochemical Research Foundation (to Kei Sato); Takeda Science Foundation (to Terumasa Ikeda); Shin-Nihon Foundation of Advanced Medical Research (to Mako Toyoda and Terumasa Ikeda); Waksman Foundation of Japan (to Terumasa Ikeda); an intramural grant from Kumamoto University COVID-19 Research Projects (AMABIE) (to Terumasa Ikeda).

# **Consortia**

Mai Kishimoto, Marie Kato, Zannatul Ferdous, Hiromi Mouri, Kenji Shishido, Naoko Misawa, Mai Suganami, Mika Chiba, Ryo Yoshimura, So Nakagawa,



739 Jiaqi Wu, Yasuhiro Kazuma, Ryosuke Nomura, Yoshihito Horisawa, Yusuke  
740 Tashiro, Yugo Kawai, Ryoko Kawabata, Ryo Shimizu, Otowa Takahashi, Kimiko  
741 Ichihara, Chihiro Motozono, Yuri L. Tanaka, Erika P. Butlertanaka, Rina  
742 Hashimoto, Takao Hashiguchi, Tateki Suzuki, Kanako Kimura, Jiei Sasaki,  
743 Yukari Nakajima, Kaori Tabata



## 744 References

- 745 Arora, P., Kempf, A., Nehlmeier, I., Schulz, S.R., Cossmann, A., Stankov, M.V.,  
746 Jack, H.M., Behrens, G.M.N., Pohlmann, S., and Hoffmann, M. (2022).  
747 Augmented neutralisation resistance of emerging omicron subvariants  
748 BA.2.12.1, BA.4, and BA.5. *Lancet Infect Dis.* 10.1016/S1473-3099(22)00422-4.  
749 Barnes, C.O., Jette, C.A., Abernathy, M.E., Dam, K.A., Esswein, S.R., Gristick,  
750 H.B., Malyutin, A.G., Sharaf, N.G., Huey-Tubman, K.E., Lee, Y.E., et al. (2020).  
751 SARS-CoV-2 neutralizing antibody structures inform therapeutic strategies.  
752 *Nature* 588, 682-687. 10.1038/s41586-020-2852-1.  
753 Bojkova, D., Stack, R., Rothenburger, T., Kandler, J.D., Ciesek, S., Wass, M.N.,  
754 Michaelis, M., and Cinatl, J., Jr. (2022). Synergism of interferon-beta with  
755 antiviral drugs against SARS-CoV-2 variants. *J Infect.*  
756 10.1016/j.jinf.2022.07.023.  
757 Bruel, T., Hadjadj, J., Maes, P., Planas, D., Seve, A., Staropoli, I.,  
758 Guivel-Benhassine, F., Porrot, F., Bolland, W.H., Nguyen, Y., et al. (2022).  
759 Serum neutralization of SARS-CoV-2 Omicron sublineages BA.1 and BA.2 in  
760 patients receiving monoclonal antibodies. *Nat Med.*  
761 10.1038/s41591-022-01792-5.  
762 Cao, Y., Wang, J., Jian, F., Xiao, T., Song, W., Yisimayi, A., Huang, W., Li, Q.,  
763 Wang, P., An, R., et al. (2021). Omicron escapes the majority of existing  
764 SARS-CoV-2 neutralizing antibodies. *Nature*, doi:  
765 <https://doi.org/10.1038/d41586-41021-03796-41586>.  
766 Cao, Y., Yisimayi, A., Jian, F., Song, W., Xiao, T., Wang, L., Du, S., Wang, J., Li,  
767 Q., Chen, X., et al. (2022). BA.2.12.1, BA.4 and BA.5 escape antibodies elicited  
768 by Omicron infection. *Nature*. 10.1038/s41586-022-04980-y.  
769 Capella-Gutierrez, S., Silla-Martinez, J.M., and Gabaldon, T. (2009). trimAl: a  
770 tool for automated alignment trimming in large-scale phylogenetic analyses.  
771 *Bioinformatics* 25, 1972-1973. 10.1093/bioinformatics/btp348.  
772 Carlin, A.F., Clark, A.E., Chaillon, A., Garretson, A.F., Bray, W., Porrachia, M.,  
773 Santos, A.T., Rana, T.M., and Smith, D.M. (2022). Virologic and Immunologic  
774 Characterization of COVID-19 Recrudescence after Nirmatrelvir/Ritonavir  
775 Treatment. *Clin Infect Dis.* 10.1093/cid/ciac496.  
776 Cele, S., Jackson, L., Khoury, D.S., Khan, K., Moyo-Gwete, T., Tegally, H., San,  
777 J.E., Cromer, D., Scheepers, C., Amoako, D., et al. (2021). Omicron extensively  
778 but incompletely escapes Pfizer BNT162b2 neutralization. *Nature*, doi:  
779 <https://doi.org/10.1038/d41586-41021-03824-41585>.  
780 Cerutti, G., Guo, Y., Zhou, T., Gorman, J., Lee, M., Rapp, M., Reddem, E.R., Yu,  
781 J., Bahna, F., Bimela, J., et al. (2021). Potent SARS-CoV-2 neutralizing  
782 antibodies directed against spike N-terminal domain target a single supersite.  
783 *Cell Host Microbe* 29, 819-833 e817. 10.1016/j.chom.2021.03.005.  
784 Chen, S., Zhou, Y., Chen, Y., and Gu, J. (2018). fastp: an ultra-fast all-in-one

785 FASTQ preprocessor. *Bioinformatics* 34, i884-i890.  
786 10.1093/bioinformatics/bty560.  
787 Chi, X., Yan, R., Zhang, J., Zhang, G., Zhang, Y., Hao, M., Zhang, Z., Fan, P.,  
788 Dong, Y., Yang, Y., et al. (2020). A neutralizing human antibody binds to the  
789 N-terminal domain of the Spike protein of SARS-CoV-2. *Science* 369, 650-655.  
790 10.1126/science.abc6952.  
791 Cingolani, P., Platts, A., Wang le, L., Coon, M., Nguyen, T., Wang, L., Land, S.J.,  
792 Lu, X., and Ruden, D.M. (2012). A program for annotating and predicting the  
793 effects of single nucleotide polymorphisms, SnpEff: SNPs in the genome of  
794 *Drosophila melanogaster* strain w1118; iso-2; iso-3. *Fly (Austin)* 6, 80-92.  
795 10.4161/fly.19695.  
796 Deguchi, S., Tsuda, M., Kosugi, K., Sakamoto, A., Mimura, N., Negoro, R., Sano,  
797 E., Nobe, T., Maeda, K., Kusuhaara, H., et al. (2021). Usability of  
798 Polydimethylsiloxane-Based Microfluidic Devices in Pharmaceutical Research  
799 Using Human Hepatocytes. *ACS Biomater Sci Eng* 7, 3648-3657.  
800 10.1021/acsbiomaterials.1c00642.  
801 Dejnirattisai, W., Huo, J., Zhou, D., Zahradnik, J., Supasa, P., Liu, C.,  
802 Duyvesteyn, H.M.E., Ginn, H.M., Mentzer, A.J., Tuekprakhon, A., et al. (2022).  
803 SARS-CoV-2 Omicron-B.1.1.529 leads to widespread escape from neutralizing  
804 antibody responses. *Cell* 185, 467-484 e415. 10.1016/j.cell.2021.12.046.  
805 Dolinsky, T.J., Czodrowski, P., Li, H., Nielsen, J.E., Jensen, J.H., Klebe, G., and  
806 Baker, N.A. (2007). PDB2PQR: expanding and upgrading automated  
807 preparation of biomolecular structures for molecular simulations. *Nucleic Acids*  
808 *Res* 35, W522-525. 10.1093/nar/gkm276.  
809 Ferreira, I., Kemp, S.A., Datir, R., Saito, A., Meng, B., Rakshit, P.,  
810 Takaori-Kondo, A., Kosugi, Y., Uriu, K., Kimura, I., et al. (2021). SARS-CoV-2  
811 B.1.617 mutations L452R and E484Q are not synergistic for antibody evasion. *J*  
812 *Infect Dis* 224, 989-994. 10.1093/infdis/jiab368.  
813 Garcia-Beltran, W.F., Lam, E.C., St Denis, K., Nitido, A.D., Garcia, Z.H., Hauser,  
814 B.M., Feldman, J., Pavlovic, M.N., Gregory, D.J., Poznansky, M.C., et al. (2021).  
815 Multiple SARS-CoV-2 variants escape neutralization by vaccine-induced  
816 humoral immunity. *Cell* 184, 2372-2383 e2379. 10.1016/j.cell.2021.03.013.  
817 GitHub (2022). "BA.2 sublineage with S:K147E, W152R, F157L, I210V, G257S,  
818 D339H, G446S, N460K, R493Q (73 seq as of 2022-06-29, mainly India) (June  
819 21, 2022)". <https://github.com/cov-lineages/pango-designation/issues/773>.  
820 Gotoh, S., Ito, I., Nagasaki, T., Yamamoto, Y., Konishi, S., Korogi, Y.,  
821 Matsumoto, H., Muro, S., Hirai, T., Funato, M., et al. (2014). Generation of  
822 alveolar epithelial spheroids via isolated progenitor cells from human pluripotent  
823 stem cells. *Stem Cell Reports* 3, 394-403. 10.1016/j.stemcr.2014.07.005.  
824 Gruell, H., Vanshylla, K., Korenkov, M., Tober-Lau, P., Zehner, M., Münn, F.,  
825 Janicki, H., Augustin, M., Schommers, P., ErikSander, L., et al. (2022).

826 SARS-CoV-2 Omicron sublineages exhibit distinct antibody escape patterns.  
827 Cell Host Microbe *in press*, <https://doi.org/10.1016/j.chom.2022.1007.1002>.  
828 Hachmann, N.P., Miller, J., Collier, A.Y., Ventura, J.D., Yu, J., Rowe, M.,  
829 Bondzie, E.A., Powers, O., Surve, N., Hall, K., and Barouch, D.H. (2022).  
830 Neutralization Escape by SARS-CoV-2 Omicron Subvariants BA.2.12.1, BA.4,  
831 and BA.5. N Engl J Med 387, 86-88. 10.1056/NEJMc2206576.  
832 Harvey, W.T., Carabelli, A.M., Jackson, B., Gupta, R.K., Thomson, E.C.,  
833 Harrison, E.M., Ludden, C., Reeve, R., Rambaut, A., Consortium, C.-G.U., et al.  
834 (2021). SARS-CoV-2 variants, spike mutations and immune escape. Nat Rev  
835 Microbiol 19, 409-424. 10.1038/s41579-021-00573-0.  
836 Hashimoto, R., Takahashi, J., Shirakura, K., Funatsu, R., Kosugi, K., Deguchi,  
837 S., Yamamoto, M., Muraoka, K., Morita, M., Tanaka, M., et al. (2022).  
838 SARS-CoV-2 disrupts the respiratory vascular barrier by suppressing Claudin-5  
839 expression. Sci Adv.  
840 Jackson, C.B., Farzan, M., Chen, B., and Choe, H. (2022). Mechanisms of  
841 SARS-CoV-2 entry into cells. Nat Rev Mol Cell Biol 23, 3-20.  
842 10.1038/s41580-021-00418-x.  
843 Khan, K., Karim, F., Ganga, Y., Bernstein, M., Jule, Z., Reedoy, K., Cele, S.,  
844 Lustig, G., Amoako, D., Wolter, N., et al. (2022). Omicron sub-lineages  
845 BA.4/BA.5 escape BA.1 infection elicited neutralizing immunity. MedRxiv, doi:  
846 <https://doi.org/10.1101/2022.1104.1129.22274477>.  
847 Khare, S., Gurry, C., Freitas, L., Schultz, M.B., Bach, G., Diallo, A., Akite, N., Ho,  
848 J., Lee, R.T., Yeo, W., et al. (2021). GISAID's Role in Pandemic Response.  
849 China CDC Wkly 3, 1049-1051. 10.46234/ccdcw2021.255.  
850 Kimura, I., Kosugi, Y., Wu, J., Zahradnik, J., Yamasoba, D., Butlertanaka, E.P.,  
851 Tanaka, Y.L., Uriu, K., Liu, Y., Morizako, N., et al. (2022a). The SARS-CoV-2  
852 Lambda variant exhibits enhanced infectivity and immune resistance. Cell Rep  
853 38, 110218. 10.1016/j.celrep.2021.110218.  
854 Kimura, I., Yamasoba, D., Nasser, H., Zahradnik, J., Kosugi, Y., Wu, J., Nagata,  
855 K., Uriu, K., Tanaka, Y.L., Ito, J., et al. (2022b). SARS-CoV-2 spike S375F  
856 mutation characterizes the Omicron BA.1 variant. BioRxiv, doi:  
857 <https://doi.org/10.1101/2022.1104.1103.486864>.  
858 Kimura, I., Yamasoba, D., Tamura, T., Nao, N., Suzuki, T., Oda, Y., Mitoma, S.,  
859 Ito, J., Nasser, H., Zahradnik, J., et al. (2022c). Virological characteristics of the  
860 novel SARS-CoV-2 Omicron variants including BA.2.12.1, BA.4 and BA.5.  
861 BioRxiv, doi: <https://doi.org/10.1101/2022.1105.1126.493539>.  
862 Kislaya, I., Casaca, P., Borges, V., Sousa, C., Ferreira, B.I., Fernandes, E., Dias,  
863 C.M., Duarte, S., Almeida, J.P., Grenho, I., et al. (2022). SARS-CoV-2 BA.5  
864 vaccine breakthrough risk and severity compared with BA.2: a case-case and  
865 cohort study using Electronic Health Records in Portugal. MedRxiv, doi:  
866 <https://doi.org/10.1101/2022.1107.1125.22277996>.

867 Kondo, N., Miyauchi, K., and Matsuda, Z. (2011). Monitoring viral-mediated  
868 membrane fusion using fluorescent reporter methods. *Curr Protoc Cell Biol*  
869 *Chapter 26*, Unit 26 29. 10.1002/0471143030.cb2609s50.

870 Konishi, S., Gotoh, S., Tateishi, K., Yamamoto, Y., Korogi, Y., Nagasaki, T.,  
871 Matsumoto, H., Muro, S., Hirai, T., Ito, I., et al. (2016). Directed Induction of  
872 Functional Multi-ciliated Cells in Proximal Airway Epithelial Spheroids from  
873 Human Pluripotent Stem Cells. *Stem Cell Reports* 6, 18-25.  
874 10.1016/j.stemcr.2015.11.010.

875 Kubik, S., Arrigo, N., Bonet, J., and Xu, Z. (2021). Mutational Hotspot in the  
876 SARS-CoV-2 Spike Protein N-Terminal Domain Conferring Immune Escape  
877 Potential. *Viruses* 13. 10.3390/v13112114.

878 Li, H. (2018). Minimap2: pairwise alignment for nucleotide sequences.  
879 *Bioinformatics* 34, 3094-3100. 10.1093/bioinformatics/bty191.

880 Li, H., and Durbin, R. (2009). Fast and accurate short read alignment with  
881 Burrows-Wheeler transform. *Bioinformatics* 25, 1754-1760.  
882 10.1093/bioinformatics/btp324.

883 Li, H., Handsaker, B., Wysoker, A., Fennell, T., Ruan, J., Homer, N., Marth, G.,  
884 Abecasis, G., Durbin, R., and Genome Project Data Processing Subgroup  
885 (2009). The sequence alignment/map format and SAMtools. *Bioinformatics* 25,  
886 2078-2079. 10.1093/bioinformatics/btp352.

887 Liu, L., Iketani, S., Guo, Y., Chan, J.F.-W., Wang, M., Liu, L., Luo, Y., Chu, H.,  
888 Huang, Y., Nair, M.S., et al. (2021). Striking antibody evasion manifested by the  
889 Omicron variant of SARS-CoV-2. *Nature*, doi:  
890 <https://doi.org/10.1038/d41586-41021-03826-41583>.

891 Liu, L., Wang, P., Nair, M.S., Yu, J., Rapp, M., Wang, Q., Luo, Y., Chan, J.F.,  
892 Sahi, V., Figueroa, A., et al. (2020). Potent neutralizing antibodies against  
893 multiple epitopes on SARS-CoV-2 spike. *Nature* 584, 450-456.  
894 10.1038/s41586-020-2571-7.

895 Lok, S.M. (2021). An NTD supersite of attack. *Cell Host Microbe* 29, 744-746.  
896 10.1016/j.chom.2021.04.010.

897 Lyke, K.E., Atmar, R.L., Islas, C.D., Posavad, C.M., Szydlo, D., Paul Chourdury,  
898 R., Deming, M.E., Eaton, A., Jackson, L.A., Branche, A.R., et al. (2022). Rapid  
899 decline in vaccine-boostered neutralizing antibodies against SARS-CoV-2  
900 Omicron variant. *Cell Rep Med*, 100679. 10.1016/j.xcrm.2022.100679.

901 Matsuyama, S., Nao, N., Shirato, K., Kawase, M., Saito, S., Takayama, I.,  
902 Nagata, N., Sekizuka, T., Katoh, H., Kato, F., et al. (2020). Enhanced isolation of  
903 SARS-CoV-2 by TMPRSS2-expressing cells. *Proc Natl Acad Sci U S A* 117,  
904 7001-7003. 10.1073/pnas.2002589117.

905 McCallum, M., De Marco, A., Lempp, F.A., Tortorici, M.A., Pinto, D., Walls, A.C.,  
906 Beltramello, M., Chen, A., Liu, Z., Zatta, F., et al. (2021). N-terminal domain  
907 antigenic mapping reveals a site of vulnerability for SARS-CoV-2. *Cell* 184,

2332-2347 e2316. 10.1016/j.cell.2021.03.028.

Meng, B., Abdullahi, A., Ferreira, I.A.T.M., Goonawardane, N., Saito, A., Kimura, I., Yamasoba, D., Gerber, P.P., Fatihi, S., Rathore, S., et al. (2022). Altered TMPRSS2 usage by SARS-CoV-2 Omicron impacts tropism and fusogenicity. *Nature*. 10.1038/s41586-022-04474-x.

Mirdita, M., Schutze, K., Moriwaki, Y., Heo, L., Ovchinnikov, S., and Steinegger, M. (2022). ColabFold: making protein folding accessible to all. *Nat Methods* 19, 679-682. 10.1038/s41592-022-01488-1.

Mittal, A., Khattri, A., and Verma, V. (2022). Structural and antigenic variations in the spike protein of emerging SARS-CoV-2 variants. *PLoS Pathog* 18, e1010260. 10.1371/journal.ppat.1010260.

Ilcochova, P., Kemp, S.A., Dhar, M.S., Papa, G., Meng, B., Ferreira, I., Datir, R., Collier, D.A., Albecka, A., Singh, S., et al. (2021). SARS-CoV-2 B.1.617.2 Delta variant replication and immune evasion. *Nature* 599, 114-119. 10.1038/s41586-021-03944-y.

Motozono, C., Toyoda, M., Zahradnik, J., Saito, A., Nasser, H., Tan, T.S., Ngare, I., Kimura, I., Uriu, K., Kosugi, Y., et al. (2021). SARS-CoV-2 spike L452R variant evades cellular immunity and increases infectivity. *Cell Host Microbe* 29, 1124-1136. 10.1016/j.chom.2021.06.006.

NIH (2022). "Clinical Management Summary (April 8, 2022)" [https://www.covid19treatmentguidelines.nih.gov/management/clinical-management/clinical-management-summary/?utm\\_source=site&utm\\_medium=home&utm\\_campaign=highlights](https://www.covid19treatmentguidelines.nih.gov/management/clinical-management/clinical-management-summary/?utm_source=site&utm_medium=home&utm_campaign=highlights).

Niwa, H., Yamamura, K., and Miyazaki, J. (1991). Efficient selection for high-expression transfectants with a novel eukaryotic vector. *Gene* 108, 193-199. 10.1016/0378-1119(91)90434-d.

Ozono, S., Zhang, Y., Ode, H., Sano, K., Tan, T.S., Imai, K., Miyoshi, K., Kishigami, S., Ueno, T., Iwatani, Y., et al. (2021). SARS-CoV-2 D614G spike mutation increases entry efficiency with enhanced ACE2-binding affinity. *Nat Commun* 12, 848. 10.1038/s41467-021-21118-2.

Ozono, S., Zhang, Y., Tobiume, M., Kishigami, S., and Tokunaga, K. (2020). Super-rapid quantitation of the production of HIV-1 harboring a luminescent peptide tag. *J Biol Chem* 295, 13023-13030. 10.1074/jbc.RA120.013887.

Planas, D., Saunders, N., Maes, P., Guivel-Benhassine, F., Planchais, C., Buchrieser, J., Bolland, W.-H., Porrot, F., Staropoli, I., Lemoine, F., et al. (2021). Considerable escape of SARS-CoV-2 Omicron to antibody neutralization. *Nature*, doi: <https://doi.org/10.1038/d41586-41021-03827-41582>.

Pruijssers, A.J., George, A.S., Schafer, A., Leist, S.R., Gralinski, L.E., Dinnon, K.H., 3rd, Yount, B.L., Agostini, M.L., Stevens, L.J., Chappell, J.D., et al. (2020). Remdesivir Inhibits SARS-CoV-2 in Human Lung Cells and Chimeric SARS-CoV Expressing the SARS-CoV-2 RNA Polymerase in Mice. *Cell Rep* 32, 107940.



949 10.1016/j.celrep.2020.107940.

950 Qu, P., Faraone, J., Evans, J.P., Zou, X., Zheng, Y.M., Carlin, C., Bednash, J.S.,  
951 Lozanski, G., Mallampalli, R.K., Saif, L.J., et al. (2022). Neutralization of the  
952 SARS-CoV-2 Omicron BA.4/5 and BA.2.12.1 Subvariants. *N Engl J Med* 386,  
953 2526-2528. 10.1056/NEJMc2206725.

954 Reed, L.J., and Muench, H. (1938). A simple method of estimating fifty percent  
955 endpoints. *Am J Hygiene* 27, 493-497.

956 Saito, A., Irie, T., Suzuki, R., Maemura, T., Nasser, H., Uriu, K., Kosugi, Y.,  
957 Shirakawa, K., Sadamasu, K., Kimura, I., et al. (2022). Enhanced fusogenicity  
958 and pathogenicity of SARS-CoV-2 Delta P681R mutation. *Nature* 602, 300-306.  
959 10.1038/s41586-021-04266-9.

960 Sano, E., Suzuki, T., Hashimoto, R., Itoh, Y., Sakamoto, A., Sakai, Y., Saito, A.,  
961 Okuzaki, D., Motooka, D., Muramoto, Y., et al. (2022). Cell response analysis in  
962 SARS-CoV-2 infected bronchial organoids. *Commun Biol* 5, 516.  
963 10.1038/s42003-022-03499-2.

964 Stalls, V., Lindenberger, J., Gobeil, S.M., Henderson, R., Parks, R., Barr, M.,  
965 Deyton, M., Martin, M., Janowska, K., Huang, X., et al. (2022). Cryo-EM  
966 structures of SARS-CoV-2 Omicron BA.2 spike. *Cell Rep* 39, 111009.  
967 10.1016/j.celrep.2022.111009.

968 Stamatakis, A. (2014). RAxML version 8: a tool for phylogenetic analysis and  
969 post-analysis of large phylogenies. *Bioinformatics* 30, 1312-1313.  
970 10.1093/bioinformatics/btu033.

971 Suryadevara, N., Shrihari, S., Gilchuk, P., VanBlargan, L.A., Binshtein, E., Zost,  
972 S.J., Nargi, R.S., Sutton, R.E., Winkler, E.S., Chen, E.C., et al. (2021).  
973 Neutralizing and protective human monoclonal antibodies recognizing the  
974 N-terminal domain of the SARS-CoV-2 spike protein. *Cell* 184, 2316-2331 e2315.  
975 10.1016/j.cell.2021.03.029.

976 Suzuki, R., Yamasoba, D., Kimura, I., Wang, L., Kishimoto, M., Ito, J., Morioka,  
977 Y., Nao, N., Nasser, H., Uriu, K., et al. (2022). Attenuated fusogenicity and  
978 pathogenicity of SARS-CoV-2 Omicron variant. *Nature*.  
979 10.1038/s41586-022-04462-1.

980 Takashita, E., Kinoshita, N., Yamayoshi, S., Sakai-Tagawa, Y., Fujisaki, S., Ito,  
981 M., Iwatsuki-Horimoto, K., Chiba, S., Halfmann, P., Nagai, H., et al. (2022a).  
982 Efficacy of antibodies and antiviral drugs against Covid-19 Omicron variant. *N*  
983 *Engl J Med*. 10.1056/NEJMc2119407.

984 Takashita, E., Kinoshita, N., Yamayoshi, S., Sakai-Tagawa, Y., Fujisaki, S., Ito,  
985 M., Iwatsuki-Horimoto, K., Halfmann, P., Watanabe, S., Maeda, K., et al. (2022b).  
986 Efficacy of Antiviral Agents against the SARS-CoV-2 Omicron Subvariant BA.2.  
987 *N Engl J Med* 386, 1475-1477. 10.1056/NEJMc2201933.

988 Takashita, E., Yamayoshi, S., Simon, V., van Bakel, H., Sordillo, E.M., Pekosz,  
989 A., Fukushi, S., Suzuki, T., Maeda, K., Halfmann, P., et al. (2022c). Efficacy of

990 Antibodies and Antiviral Drugs against Omicron BA.2.12.1, BA.4, and BA.5  
991 Subvariants. *N Engl J Med* 387, 468-470. 10.1056/NEJMc2207519.

992 Tamura, T., Yamasoba, D., Oda, Y., Ito, J., Kamasaki, T., Nao, N., Hashimoto,  
993 R., Fujioka, Y., Suzuki, R., Wang, L., et al. (2022). Comparative pathogenicity of  
994 SARS-CoV-2 Omicron subvariants including BA.1, BA.2, and BA.5. *BioRxiv*, doi:  
995 <https://doi.org/10.1101/2022.1108.1105.502758>.

996 Toelzer, C., Gupta, K., Yadav, S.K.N., Borucu, U., Davidson, A.D., Kavanagh  
997 Williamson, M., Shoemark, D.K., Garzoni, F., Stauffer, O., Milligan, R., et al.  
998 (2020). Free fatty acid binding pocket in the locked structure of SARS-CoV-2  
999 spike protein. *Science* 370, 725-730. 10.1126/science.abd3255.

1000 Tuekprakhon, A., Nutalai, R., Dijokaite-Guraliuc, A., Zhou, D., Ginn, H.M.,  
1001 Selvaraj, M., Liu, C., Mentzer, A.J., Supasa, P., Duyvesteyn, H.M.E., et al.  
1002 (2022). Antibody escape of SARS-CoV-2 Omicron BA.4 and BA.5 from vaccine  
1003 and BA.1 serum. *Cell* 185, 2422-2433 e2413. 10.1016/j.cell.2022.06.005.

1004 Uriu, K., Cardenas, P., Munoz, E., Barragan, V., Kosugi, Y., Shirakawa, K.,  
1005 Takaori-Kondo, A., Sato, K., Ecuador-Covid19 Consortium, and The Genotype  
1006 to Phenotype Japan (G2P-Japan) Consortium (2022). Characterization of the  
1007 immune resistance of SARS-CoV-2 Mu variant and the robust immunity induced  
1008 by Mu infection. *J Infect Dis*. 10.1093/infdis/jiac053.

1009 Uriu, K., Kimura, I., Shirakawa, K., Takaori-Kondo, A., Nakada, T.A., Kaneda, A.,  
1010 Nakagawa, S., Sato, K., and The Genotype to Phenotype Japan (G2P-Japan)  
1011 Consortium (2021). Neutralization of the SARS-CoV-2 Mu variant by  
1012 convalescent and vaccine serum. *N Engl J Med* 385, 2397-2399.  
1013 10.1056/NEJMc2114706.

1014 VanBlargan, L.A., Errico, J.M., Halfmann, P.J., Zost, S.J., Crowe, J.E., Jr.,  
1015 Purcell, L.A., Kawaoka, Y., Corti, D., Fremont, D.H., and Diamond, M.S. (2022).  
1016 An infectious SARS-CoV-2 B.1.1.529 Omicron virus escapes neutralization by  
1017 therapeutic monoclonal antibodies. *Nat Med*. 10.1038/s41591-021-01678-y.

1018 Voss, W.N., Hou, Y.J., Johnson, N.V., Delidakis, G., Kim, J.E., Javanmardi, K.,  
1019 Horton, A.P., Bartzoka, F., Paresi, C.J., Tanno, Y., et al. (2021). Prevalent,  
1020 protective, and convergent IgG recognition of SARS-CoV-2 non-RBD spike  
1021 epitopes. *Science* 372, 1108-1112. 10.1126/science.abg5268.

1022 Wang, Q., Guo, Y., Iketani, S., Nair, M.S., Li, Z., Mohri, H., Wang, M., Yu, J.,  
1023 Bowen, A.D., Chang, J.Y., et al. (2022). Antibody evasion by SARS-CoV-2  
1024 Omicron subvariants BA.2.12.1, BA.4, & BA.5. *Nature*.  
1025 10.1038/s41586-022-05053-w.

1026 WHO (2022). "Tracking SARS-CoV-2 variants (July 19, 2022)"  
1027 <https://www.who.int/en/activities/tracking-SARS-CoV-2-variants>.

1028 Yamamoto, M., Kiso, M., Sakai-Tagawa, Y., Iwatsuki-Horimoto, K., Imai, M.,  
1029 Takeda, M., Kinoshita, N., Ohmagari, N., Gohda, J., Semba, K., et al. (2020).  
1030 The Anticoagulant Nafamostat Potently Inhibits SARS-CoV-2 S



Protein-Mediated Fusion in a Cell Fusion Assay System and Viral Infection In Vitro in a Cell-Type-Dependent Manner. *Viruses* 12. 10.3390/v12060629.

Yamamoto, Y., Gotoh, S., Korogi, Y., Seki, M., Konishi, S., Ikeo, S., Sone, N., Nagasaki, T., Matsumoto, H., Muro, S., et al. (2017). Long-term expansion of alveolar stem cells derived from human iPS cells in organoids. *Nat Methods* 14, 1097-1106. 10.1038/nmeth.4448.

Yamasoba, D., Kimura, I., Kosugi, Y., Fujita, S., Uriu, K., Ito, J., Sato, K., and The Genotype to Phenotype Japan (G2P-Japan) Consortium (2022a). Neutralization sensitivity of Omicron BA.2.75 to therapeutic monoclonal antibodies. *BioRxiv*, doi: <https://doi.org/10.1101/2022.1107.1114.500041>.

Yamasoba, D., Kimura, I., Nasser, H., Morioka, Y., Nao, N., Ito, J., Uriu, K., Tsuda, M., Zahradnik, J., Shirakawa, K., et al. (2022b). Virological characteristics of the SARS-CoV-2 Omicron BA.2 spike. *Cell*. 10.1016/j.cell.2022.04.035.

Yamasoba, D., Kosugi, Y., Kimura, I., Fujita, S., Uriu, K., Ito, J., Sato, K., and The Genotype to Phenotype Japan (G2P-Japan) Consortium (2022c). Neutralisation sensitivity of SARS-CoV-2 omicron subvariants to therapeutic monoclonal antibodies. *Lancet Infect Dis* 22, 942-943. 10.1016/S1473-3099(22)00365-6.

Yan, R., Zhang, Y., Li, Y., Xia, L., Guo, Y., and Zhou, Q. (2020). Structural basis for the recognition of SARS-CoV-2 by full-length human ACE2. *Science* 367, 1444-1448. 10.1126/science.abb2762.

Zahradnik, J., Dey, D., Marciano, S., Kolarova, L., Charendoff, C.I., Subtil, A., and Schreiber, G. (2021a). A Protein-Engineered, Enhanced Yeast Display Platform for Rapid Evolution of Challenging Targets. *ACS Synth Biol* 10, 3445-3460. 10.1021/acssynbio.1c00395.

Zahradnik, J., Marciano, S., Shemesh, M., Zoler, E., Harari, D., Chiaravalli, J., Meyer, B., Rudich, Y., Li, C., Marton, I., et al. (2021b). SARS-CoV-2 variant prediction and antiviral drug design are enabled by RBD in vitro evolution. *Nat Microbiol* 6, 1188-1198. 10.1038/s41564-021-00954-4.

Zahradnik, J., Nunvar, J., and Schreiber, G. (2022). Perspectives: SARS-CoV-2 Spike Convergent Evolution as a Guide to Explore Adaptive Advantage. *Front Cell Infect Microbiol* 12, 748948. 10.3389/fcimb.2022.748948.

1066 **Table 1. Effects of three antiviral drugs against BA.2.75 in AO**

|              | EC <sub>50</sub> (μM) |      |      |         | EC <sub>50</sub> ratio |              |            |            |               |
|--------------|-----------------------|------|------|---------|------------------------|--------------|------------|------------|---------------|
|              | B.1.1                 | BA.2 | BA.5 | BA.2.75 | BA.5/BA.2              | BA.2.75/BA.2 | BA.2/B.1.1 | BA.5/B.1.1 | BA.2.75/B.1.1 |
| Remdesivir   | 1.08                  | 1.89 | 1.31 | 0.63    | 0.70                   | 0.34         | 1.75       | 1.21       | 0.59          |
| EIDD-1931    | 0.24                  | 0.02 | 0.21 | 0.08    | 8.82                   | 3.53         | 0.10       | 0.89       | 0.36          |
| Nirmatrelvir | 0.84                  | 0.85 | 0.63 | 0.81    | 0.74                   | 0.95         | 1.02       | 0.75       | 0.97          |

1067

## Figure legends

### Figure 1. Epidemics of BA.2.75 in India

(A) A maximum likelihood tree of Omicron sublineages. Sequences of BA.1–BA.5 sampled from South Africa and BA.2.75 are included. The mutations acquired in the S protein of BA.2.75 are indicated in the panel. Note that R493Q is a reversion [i.e., back mutation from the BA.1–BA.3 lineages (R493) to the B.1.1 lineage (Q493)]. Bootstrap values, \*,  $\geq 0.8$ ; \*\*,  $\geq 0.95$ .

(B) Amino acid differences among BA.2, BA.2.75, and BA.5. Heatmap color indicates the frequency of amino acid substitutions.

(C) Lineage frequencies of BA.5 (left) and BA.2.75 (right) in each Indian state. SARS-CoV-2 sequences collected from June 15, 2022, to July 15, 2022, were analyzed.

(D) Epidemic dynamics of SARS-CoV-2 lineages in Indian states. Results for BA.2.75 and BA.5 are shown. The observed daily sequence frequency (dot) and the dynamics (posterior mean, line; 95% CI, ribbon) are shown. The dot size is proportional to the number of sequences.

(E) Estimated relative  $R_e$  of each viral lineage, assuming a fixed generation time of 2.1 days. The  $R_e$  value of BA.2 is set at 1. The posterior (violin), posterior mean (dot), and 95% CI (line) are shown. The average values across India estimated by a Bayesian hierarchical model are shown, and the state-specific  $R_e$  values are shown in **Figure S1B**. The dynamics of the top seven predominant lineages in India were estimated. BA.5 sublineages are summarized as “BA.5”, and non-predominant BA.2 sublineages are summarized as “other BA.2”.

See also **Figure S1 and Table S1**.

### Figure 2. Immune resistance of BA.2.75

Neutralization assays were performed with pseudoviruses harboring the S proteins of B.1.1 (the D614G-bearing ancestral virus), BA.1, BA.2, BA.2.75. Delta pseudovirus is included only in the experiment shown in **F**. The BA.2 S-based derivatives are included in **H and I**. The following sera were used.

(A–C) BNT162b2 vaccine sera (15 donors) collected at 1 month after 2nd-dose vaccination (A), 1 month after 3rd-dose vaccination (B), and 4 months after 3rd-dose vaccination (C).

(D) Convalescent sera from fully vaccinated individuals who had been infected with BA.1 after full vaccination (16 2-dose vaccinated donors).

(E) Convalescent sera from fully vaccinated individuals who had been infected with BA.2 after full vaccination (9 2-dose vaccinated and 5 3-dose vaccinated. 14 donors in total).

(F) Convalescent sera from unvaccinated individuals who had been infected with Delta (18 donors).

1109 (G–I) Sera from hamsters infected with BA.1 (6 hamsters) (G), BA.2 (6  
1110 hamsters) (H), and BA.5 (6 hamsters) (I).  
1111 Assays for each serum sample were performed in triplicate to determine the  
1112 50% neutralization titer (NT50). Each dot represents one NT50 value, and the  
1113 geometric mean and 95% CI are shown. The numbers in the panels indicate the  
1114 fold change resistance versus BA.2 (B–E, G and H) or BA.5 (I). The horizontal  
1115 dashed line indicates the detection limit (120-fold in other than F, 40-fold in F).  
1116 Statistically significant differences were determined by two-sided Wilcoxon  
1117 signed-rank tests. The *P* values versus BA.2 (B–E, G and H) or BA.5 (I) are  
1118 indicated in the panels. For the BA.2 derivatives and B.1.1 (H and I), statistically  
1119 significant differences versus BA.2 (*P* < 0.05) are indicated with asterisks.  
1120 Information on the vaccinated/convalescent donors is summarized in Table S2.  
1121 See also Table S2.

### 1122 Figure 3. Virological features of BA.2.75 S *in vitro*

1123 (A) Pseudovirus assay. The percent infectivity compared to that of the virus  
1124 pseudotyped with the BA.2 S protein are shown.  
1125 (B) Binding affinity of the RBD of SARS-CoV-2 S protein to ACE2 by yeast  
1126 surface display. The *K<sub>D</sub>* value indicating the binding affinity of the RBD of the  
1127 SARS-CoV-2 S protein to soluble ACE2 when expressed on yeast is shown.  
1128 (C) Electrostatic potential of B.1.1 S RBD (PDB: 6M17) (Yan et al., 2020), BA.2  
1129 S RBD (PDB: 7UB0) (Stalls et al., 2022) and BA.2.75 S RBD. The structure of  
1130 BA.2.75 S RBD was prepared using AlphaFold2 (Mirdita *et al.*, 2022).  
1131 Electrostatic potential surface depictions calculated by PDB2PQR tool (Dolinsky  
1132 et al., 2007) with the positions of BA.2.75 characteristic mutations. The scale bar  
1133 shows the electrostatic charge [kT/e].  
1134 (D) The binding of BA.2.75 S RBD and human ACE2 (PDB: 6M17) (Yan *et al.*,  
1135 2020). Left, the four substitutions in BA.2.75 S RBD compared to BA.2 S RBD  
1136 are highlighted. Right, binding of BA.2.75 S RBD (top) and human ACE2  
1137 (bottom). The electrostatic potential surface of human ACE2 is shown.  
1138 (E and F) S-based fusion assay. (E) S protein expression on the cell surface.  
1139 The summarized data are shown. (F) S-based fusion assay in Calu-3 cells. The  
1140 recorded fusion activity (arbitrary units) is shown. The dashed green line  
1141 indicates the results of BA.2.  
1142 Assays were performed in quadruplicate (A and F) or triplicate (B and E), and  
1143 the presented data are expressed as the average ± SD. In A and B, the dashed  
1144 horizontal lines indicated the value of BA.2. In A, B and E, each dot indicates the  
1145 result of an individual replicate. In A, B and E, statistically significant differences  
1146 between BA.2 and other variants (\*, *P* < 0.05) were determined by two-sided  
1147 Student's *t* tests. In F, statistically significant differences between BA.2 and other

1149 variants across timepoints were determined by multiple regression. The FWERs  
1150 calculated using the Holm method are indicated in the figures.  
1151 See also **Figure S3**.

1152

#### 1153 **Figure 4. Growth capacity of BA.2.75 *in vitro***

1154 **(A–I)** Growth kinetics of B.1.1, Delta, BA.2, BA.5 and BA.2.75. Clinical isolates of  
1155 B.1.1 (strain TKYE610670; GISAID ID: EPI\_ISL\_479681), Delta (B.1.617.2,  
1156 strain TKYTK1734; GISAID ID: EPI\_ISL\_2378732), BA.2 (strain TY40-385;  
1157 GISAID ID: EPI\_ISL\_9595859), BA.5 (strain TKYS14631; GISAID ID:  
1158 EPI\_ISL\_12812500), and BA.2.75 (strain TY41-716; GISAID ID:  
1159 EPI\_ISL\_13969765) were inoculated into Vero cells **(A)**, VeroE6/TMPRSS2  
1160 cells **(B)**, HEK293-ACE2/TMPRSS2 cells **(C)**, AO-ALI **(D)**, iPSC-derived airway  
1161 epithelial cells **(E)**, iPSC-derived lung epithelial cells **(F)**, and an  
1162 airway-on-a-chip system **(G and H)**; the scheme of experimental system is  
1163 illustrated in **Figure S3C**). The copy numbers of viral RNA in the culture  
1164 supernatant **(A–C)**, the apical sides of cultures **(D–F)**, the top **(G)** and bottom **(H)**  
1165 channels of an airway-on-a-chip were routinely quantified by RT-qPCR. The  
1166 dashed green line in each panel indicates the results of BA.2. In **I**, the  
1167 percentage of viral RNA load in the bottom channel per top channel at 6 d.p.i.  
1168 (i.e., % invaded virus from the top channel to the bottom channel) is shown.  
1169 **(J)** Plaque assay. VeroE6/TMPRSS2 cells were used for the target cells.  
1170 Representative panels (left) and a summary of the recorded plaque diameters  
1171 (20 plaques per virus) (right) are shown.  
1172 Assays were performed in quadruplicate, and the presented data are expressed  
1173 as the average  $\pm$  SD. In **A–H**, statistically significant differences between BA.2  
1174 and the other variants across timepoints were determined by multiple regression.  
1175 The FWERs calculated using the Holm method are indicated in the figures. In **I**  
1176 **and J (right)**, statistically significant differences versus BA.2 (\*,  $P < 0.05$ ) were  
1177 determined by two-sided Mann–Whitney  $U$  tests. Each dot indicates the result of  
1178 an individual replicate.

1179 See also **Figure S3**.

1180

#### 1181 **Figure 5. Virological characteristics of BA.2.75 *in vivo***

1182 Syrian hamsters were intranasally inoculated with Delta, BA.2, BA.5 and  
1183 BA.2.75. Six hamsters at the same age were intranasally inoculated with saline  
1184 (uninfected). Six hamsters per each group were used to routinely measure  
1185 respective parameters **(A and B)**. Four hamsters per each group were  
1186 euthanized at 2 and 5 d.p.i and used for virological and pathological analysis  
1187 **(C–G)**.

1188 **(A)** Body weight, Penh, Rpef, BPM, and SpO<sub>2</sub> values of infected hamsters (n = 6  
1189 per infection group).

1190 **(B)** Viral RNA loads in the oral swab (n = 6 per infection group).  
 1191 **(C)** Viral RNA loads in the lung hilum (left) and lung periphery (right) of infected  
 1192 hamsters (n = 4 per infection group) at 2 d.p.i. (top) and 5 d.p.i. (bottom).  
 1193 **(D and E)** IHC of the viral N protein in the lungs at 2 d.p.i. (top) and 5 d.p.i.  
 1194 (bottom) of all infected hamsters. **(D)** Representative figures. **(E)** Percentage of  
 1195 N-positive cells in whole lung lobes (n = 4 per infection group). The raw data are  
 1196 shown in **Figure S4B and S4C**.  
 1197 **(F and G)** **(F)** H&E staining of the lungs of infected hamsters. Representative  
 1198 figures are shown. Uninfected lung alveolar space and bronchioles are also  
 1199 shown. **(G)** Histopathological scoring of lung lesions (n = 4 per infection group).  
 1200 Representative pathological features are reported in our previous studies  
 1201 (Kimura *et al.*, 2022c; Saito *et al.*, 2022; Suzuki *et al.*, 2022; Yamasoba *et al.*,  
 1202 2022b).  
 1203 **(H)** Type II pneumocytes in the lungs of infected hamsters. The percentage of  
 1204 the area of type II pneumocytes in the lung at 5 d.p.i. is summarized. The raw  
 1205 data are shown in **Figure S4D**.  
 1206 In **A–C, E, G and H**, data are presented as the average  $\pm$  SEM. In **C, E and H**,  
 1207 each dot indicates the result of an individual hamster.  
 1208 In **A, B and G**, statistically significant differences between BA.2 and other  
 1209 variants across timepoints were determined by multiple regression. In **A**, the 0  
 1210 d.p.i. data were excluded from the analyses. The FWERs calculated using the  
 1211 Holm method are indicated in the figures.  
 1212 In **C, E and G**, the statistically significant differences between BA.2 and other  
 1213 variants were determined by a two-sided Mann–Whitney *U* test.  
 1214 In **D and F**, each panel shows a representative result from an individual infected  
 1215 hamster. Scale bars, 500  $\mu$ m (**D**); 200  $\mu$ m (**F**).  
 1216 See also **Figure S4**.  
 1217  
 1218 **Table S1.** Estimated relative  $R_e$  values of viral lineages in India, related to  
 1219 **Figure 1**  
 1220  
 1221 **Table S2.** Human sera used in this study, related to **Figure 2**  
 1222  
 1223 **Table S3.** Primers used for the construction of SARS-CoV-2 S expression  
 1224 plasmids, related to **Figures 2 and 3**  
 1225  
 1226 **Table S4.** Summary of unexpected amino acid mutations detected in the  
 1227 working virus stocks, related to **Figures 4 and 5 and Table 1**  
 1228  
 1229 **Figure S1.** Epidemic dynamics of BA.2.75 in India, related to **Figure 1**



1230 (A) Amino acid differences in B.1.1, Delta, BA.2, BA.5 and BA.2.75 compared to  
1231 the SARS-CoV-2 A lineage. Heatmap color indicates the frequency of amino  
1232 acid mutations.

1233 (B) Estimated relative  $R_e$  of each viral lineage, assuming a fixed generation time  
1234 of 2.1 days. The  $R_e$  value of BA.2 is set at 1. The posterior (violin), posterior  
1235 mean (dot), and 95% CI (line) are shown. The  $R_e$  values for respective Indian  
1236 states are shown. The dynamics of the top seven predominant lineages in India  
1237 were estimated. BA.5 sublineages are summarized as “BA.5”, and  
1238 non-predominant BA.2 sublineages are summarized as “other BA.2”. Raw data  
1239 are summarized in **Table S1**.

1240 (C) Fold change in  $R_e$  values between BA.2.75 and BA.5. Posterior mean (dot)  
1241 and 95% CI (line) are shown. Red indicates that the 95% CI does not overlap  
1242 with the value of 1.

1243

#### 1244 **Figure S2. Effects of antiviral drugs in AO, related to Table 1**

1245 (A) Antiviral effects of the three drugs in AO culture. The assay of each antiviral  
1246 drugs was performed in quadruplicate, and the 50% effective concentration  
1247 ( $EC_{50}$ ) was calculated. The data are summarized in **Table 1**.

1248 (B) Cytotoxic effects of the three drugs in AO culture. The assay of each antiviral  
1249 drugs was performed in quadruplicate, and the 50% cytotoxic concentration  
1250 ( $CC_{50}$ ) was calculated. The  $CC_{50}$  values are indicated in the panels.

1251

#### 1252 **Figure S3. Virological features of BA.2.75 *in vitro*, related to Figures 3 and** 1253 **4**

1254 (A) Fold increase in pseudovirus infectivity based on TMPRSS2 expression.

1255 (B) The structural effect of the D339H substitution in the BA.2.75 S RBD. The  
1256 BA.2 S RBD (PDB: 7UB0) (Stalls *et al.*, 2022) and an AlphaFold2 structural  
1257 model of BA.2.75 S RBD (bottom) are shown. The residues 339 and 343 are  
1258 indicated in stick. The squared regions are enlarged in the right panel. A dashed  
1259 line in the top panel indicates ion-dipole interaction between the D339 and the  
1260 N343 residues.

1261 (C) A scheme of airway-on-a-chip system.

1262

#### 1263 **Figure S4. Histological observations in infected hamsters, related to** 1264 **Figure 5**

1265 (A) IHC of the viral N protein in the middle portion of the tracheas of all infected  
1266 hamsters at 2 d.p.i (4 hamsters per infection group). Each panel shows a  
1267 representative result from an individual infected hamster.

1268 (B and C) IHC of the SARS-CoV-2 N protein in the lungs of infected hamsters at  
1269 2 d.p.i. (B) and 5 d.p.i. (C) (4 hamsters per infection group). In each panel, IHC  
1270 staining (top) and the digitalized N-positive area (bottom, indicated in red) are



1271 shown. The red numbers in the bottom panels indicate the percentage of the  
 1272 N-positive area. Summarized data are shown in **Figure 5E**.  
 1273 **(D)** Type II pneumocytes in the lungs of infected hamsters (4 hamsters per  
 1274 infection group). H&E staining (top) and the digitalized inflammatory area with  
 1275 type II pneumocytes (bottom, indicated in red) are shown. The red numbers in  
 1276 the bottom panels indicate the percentage of inflammatory area with type II  
 1277 pneumocytes. Summarized data are shown in **Figure 5H**.  
 1278 Scale bars, 1 mm (**A**); 5 mm (**B–D**).

## 1279 **STAR<sup>®</sup>METHODS**

1280

## 1281 **KEY RESOURCES TABLE**

### 1282 **RESOURCE AVAILABILITY**

#### 1283 **Lead Contact**

1284 Further information and requests for resources and reagents should be directed  
1285 to and will be fulfilled by the Lead Contact, Kei Sato  
1286 ([KeiSato@g.ecc.u-tokyo.ac.jp](mailto:KeiSato@g.ecc.u-tokyo.ac.jp)).

1287

#### 1288 **Materials Availability**

1289 All unique reagents generated in this study are listed in the Key Resources  
1290 Table and available from the Lead Contact with a completed Materials Transfer  
1291 Agreement.

1292

#### 1293 **Data and Software Availability**

1294 All databases/datasets used in this study are available from GISAID database  
1295 (<https://www.gisaid.org>) and GenBank database (<https://www.gisaid.org>;  
1296 EPI\_SET ID: EPI\_SET\_220804hy).

1297 The computational codes used in the present study, the raw data of  
1298 virus sequences, and the GISAID supplemental table for EPI\_SET ID:  
1299 EPI\_SET\_220804hy are available in the GitHub repository  
1300 ([https://github.com/TheSatoLab/Omicron\\_BA.2.75](https://github.com/TheSatoLab/Omicron_BA.2.75)).

1301

## 1302 **EXPERIMENTAL MODEL AND SUBJECT DETAILS**

### 1303 **Ethics statement**

1304 All experiments with hamsters were performed in accordance with the Science  
1305 Council of Japan's Guidelines for the Proper Conduct of Animal Experiments.  
1306 The protocols were approved by the Institutional Animal Care and Use  
1307 Committee of National University Corporation Hokkaido University (approval ID:  
1308 20-0123 and 20-0060). All experiments with mice were also performed in  
1309 accordance with the Science Council of Japan's Guidelines for the Proper  
1310 Conduct of Animal Experiments. All protocols involving specimens from human  
1311 subjects recruited at Kyoto University were reviewed and approved by the  
1312 Institutional Review Boards of Kyoto University (approval ID: G1309) and Chiba  
1313 University (approval ID: HS202103-03). All human subjects provided written  
1314 informed consent. All protocols for the use of human specimens were reviewed  
1315 and approved by the Institutional Review Boards of The Institute of Medical  
1316 Science, The University of Tokyo (approval IDs: 2021-1-0416 and  
1317 2021-18-0617), Kyoto University (approval ID: G0697), Kumamoto University  
1318 (approval IDs: 2066 and 2074), and University of Miyazaki (approval ID:  
1319 O-1021).

1320

# 1321 Human serum collection

1322 Vaccine sera of fifteen individuals who had BNT162b2 vaccine  
1323 (Pfizer/BioNTech) (average age: 38, range: 24–48; 53% male) (**Figures 2A–2C**)  
1324 were obtained at one month after the second dose, one month after the third  
1325 dose, and four months after the third dose. The details of the vaccine sera are  
1326 summarized in **Table S2**.

1327 Convalescent sera were collected from the following donors: fully  
1328 vaccinated individuals who had been infected with BA.1 (16 2-dose vaccinated.  
1329 10–27 days after testing; average age: 48, range: 20–76, 44% male) (**Figure**  
1330 **2D**), fully vaccinated individuals who had been infected with BA.2 (9 2-dose  
1331 vaccinated and 5 3-dose vaccinated. 11–61 days after testing. n=14 in total;  
1332 average age: 47, range: 24–84, 64% male) (**Figure 2E**), and unvaccinated  
1333 individuals who had been infected with Delta (6–55 days after testing. n=18 in  
1334 total; average age: 50, range: 22–67, 78% male) (**Figure 2F**). The SARS-CoV-2  
1335 variants were identified as previously described (Kimura *et al.*, 2022c;  
1336 Yamasoba *et al.*, 2022b). Sera were inactivated at 56°C for 30 minutes and  
1337 stored at –80°C until use. The details of the convalescent sera are summarized  
1338 in **Table S2**.

1339

# 1340 Cell culture

1341 HEK293T cells (a human embryonic kidney cell line; ATCC, CRL-3216),  
1342 HEK293 cells (a human embryonic kidney cell line; ATCC, CRL-1573) and  
1343 HOS-ACE2/TMPRSS2 cells (HOS cells stably expressing human ACE2 and  
1344 TMPRSS2) (Ferreira *et al.*, 2021; Ozono *et al.*, 2021) were maintained in DMEM  
1345 (high glucose) (Sigma-Aldrich, Cat# 6429-500ML) containing 10% fetal bovine  
1346 serum (FBS, Sigma-Aldrich Cat# 172012-500ML) and 1%  
1347 penicillin-streptomycin (PS) (Sigma-Aldrich, Cat# P4333-100ML).

1348 HEK293-ACE2 cells (HEK293 cells stably expressing human ACE2) (Motozono  
1349 *et al.*, 2021) were maintained in DMEM (high glucose) containing 10% FBS, 1  
1350 µg/ml puromycin (InvivoGen, Cat# ant-pr-1) and 1% PS.

1351 HEK293-ACE2/TMPRSS2 cells (HEK293 cells stably expressing human ACE2  
1352 and TMPRSS2) (Motozono *et al.*, 2021) were maintained in DMEM (high  
1353 glucose) containing 10% FBS, 1 µg/ml puromycin, 200 ng/ml hygromycin  
1354 (Nacalai Tesque, Cat# 09287-84) and 1% PS.

1355 Vero cells [an African green monkey (*Chlorocebus sabaeus*) kidney cell line;  
1356 JCRB Cell Bank, JCRB0111] were maintained in Eagle's minimum essential  
1357 medium (EMEM) (Sigma-Aldrich, Cat# M4655-500ML) containing 10% FBS and  
1358 1% PS.

1359 VeroE6/TMPRSS2 cells (VeroE6 cells stably expressing human TMPRSS2;  
1360 JCRB Cell Bank, JCRB1819) (Matsuyama *et al.*, 2020) were maintained in

DMEM (low glucose) (Wako, Cat# 041-29775) containing 10% FBS, G418 (1 mg/ml; Nacalai Tesque, Cat# G8168-10ML) and 1% PS. Calu-3/DSP<sub>1-7</sub> cells (Calu-3 cells stably expressing DSP<sub>1-7</sub>) (Yamamoto et al., 2020) were maintained in EMEM (Wako, Cat# 056-08385) containing 20% FBS and 1% PS. Human airway and alveolar epithelial cells derived from human induced pluripotent stem cells (iPSCs) were manufactured according to established protocols as described below (see “Preparation of human airway and alveolar epithelial cells from human iPSCs” section) and provided by HiLung Inc. Airway organoids (AO) and AO-derived air-liquid interface model (AO-ALI) were generated according to established protocols as described below (see “Airway organoids” and “AO-ALI model” sections).

1373

## 1374 **METHOD DETAILS**

### 1375 **Viral genome sequencing**

1376 Viral genome sequencing was performed as previously described (Meng *et al.*,  
1377 2022; Motozono *et al.*, 2021; Saito *et al.*, 2022; Suzuki *et al.*, 2022; Yamasoba *et al.*, 2022b). Briefly, the virus sequences were verified by viral RNA-sequencing  
1378 analysis. Viral RNA was extracted using a QIAamp viral RNA mini kit (Qiagen,  
1379 Cat# 52906). The sequencing library employed for total RNA sequencing was  
1380 prepared using the NEB next ultra RNA library prep kit for Illumina (New England  
1381 Biolabs, Cat# E7530). Paired-end 76-bp sequencing was performed using a  
1382 MiSeq system (Illumina) with MiSeq reagent kit v3 (Illumina, Cat# MS-102-3001).  
1383 Sequencing reads were trimmed using fastp v0.21.0 (Chen et al., 2018) and  
1384 subsequently mapped to the viral genome sequences of a lineage B isolate  
1385 (strain Wuhan-Hu-1; GenBank accession number: NC\_045512.2) (Matsuyama  
1386 *et al.*, 2020) using BWA-MEM v0.7.17 (Li and Durbin, 2009). Variant calling,  
1387 filtering, and annotation were performed using SAMtools v1.9 (Li et al., 2009)  
1388 and snpEff v5.0e (Cingolani et al., 2012).

1390

### 1391 **Phylogenetic analyses**

1392 To construct an ML tree of Omicron lineages (BA.1–BA.5) sampled from South  
1393 Africa and BA.2.75 (shown in **Figure 1A**), the genome sequence data of  
1394 SARS-CoV-2 and its metadata were downloaded from the GISAID database  
1395 (<https://www.gisaid.org/>) (Khare et al., 2021) on July 23, 2022. We excluded the  
1396 data of viral strains with the following features from the analysis: i) a lack  
1397 collection date information; ii) sampling from animals other than humans, iii) >2%  
1398 undetermined nucleotide characters, or iv) sampling by quarantine. From each  
1399 viral lineage, 30 sequences were randomly sampled and used for tree  
1400 construction, in addition to an outgroup sequence, EPI\_ISL\_466615,  
1401 representing the oldest isolate of B.1.1 obtained in the UK. The viral genome

1402 sequences were mapped to the reference sequence of Wuhan-Hu-1 (GenBank  
1403 accession number: NC\_045512.2) using Minimap2 v2.17 (Li, 2018) and  
1404 subsequently converted to a multiple sequence alignment according to the  
1405 GISAID phylogenetic analysis pipeline  
1406 (<https://github.com/roblanf/sarscov2phylo>). The alignment sites corresponding to  
1407 the 1–265 and 29674–29903 positions in the reference genome were masked  
1408 (i.e., converted to NNN). Alignment sites at which >50% of sequences contained  
1409 a gap or undetermined/ambiguous nucleotide were trimmed using trimAl v1.2  
1410 (Capella-Gutierrez et al., 2009). Phylogenetic tree construction was performed  
1411 via a three-step protocol: i) the first tree was constructed; ii) tips with longer  
1412 external branches (Z score > 4) were removed from the dataset; iii) and the final  
1413 tree was constructed. Tree reconstruction was performed by RAxML v8.2.12  
1414 (Stamatakis, 2014) under the GTRCAT substitution model. The node support  
1415 value was calculated by 100 times bootstrap analysis.

1416

# 1417 **Modelling the epidemic dynamics of SARS-CoV-2 lineages**

1418 To quantify the spread rate of each SARS-CoV-2 lineage in the human  
1419 population in India, we estimated the relative  $R_e$  of each viral lineage according  
1420 to the epidemic dynamics, calculated on the basis of viral genomic surveillance  
1421 data. The data were downloaded from the GISAID database  
1422 (<https://www.gisaid.org/>) on August 1, 2022. We excluded the data of viral  
1423 strains with the following features from the analysis: i) a lack of collection date  
1424 information; ii) sampling in animals other than humans; or iii) sampling by  
1425 quarantine. We analyzed the datasets of the ten states of India, where  $\geq 20$   
1426 sequences of either BA.2.75 or BA.5 are reported (i.e., Himachal Pradesh,  
1427 Odisha, Haryana, Rajasthan, and Maharashtra, Gujarat, West Bengal, Delhi,  
1428 Tamil Nadu, and Telangana). BA.5 sublineages are summarized as “BA.5”, and  
1429 BA.2 sublineages with  $\leq 400$  sequences are summarized as “other BA.2”.  
1430 Subsequently, the dynamics of the top seven predominant lineages in India were  
1431 estimated from April 24, 2022, to August 1, 2022, were analyzed. The number of  
1432 viral sequences of each viral lineage collected on each day in each country was  
1433 counted, and the count matrix was constructed as an input for the statistical  
1434 model below.

1435 We constructed a Bayesian hierarchical model to represent relative  
1436 lineage growth dynamics with multinomial logistic regression as described in our  
1437 previous study (Yamasoba *et al.*, 2022b). In brief, we incorporated a hierarchical  
1438 structure into the slope parameter over time, which enabled us to estimate the  
1439 global average relative  $R_e$  of each viral lineage in India as well as the average  
1440 value for each country. Arrays in the model index over one or more indices:  $L = 7$   
1441 viral lineages  $l$ ;  $S = 10$  states  $s$ ; and  $T = 100$  days  $t$ . The model is:

$$\beta_{ls} \sim \text{Student\_t}(6, \beta_l, \sigma_l)$$

$$\begin{aligned}\mu_{lst} &= \alpha_{ls} + \beta_{ls}t \\ \theta_{.st} &= \text{softmax}(\mu_{.st}) \\ y_{lst} &\sim \text{Multinomial}\left(\sum_l y_{lst}, \theta_{.st}\right)\end{aligned}$$

1442 The explanatory variable was time,  $t$ , and the outcome variable was  $y_{lst}$ , which  
1443 represented the count of viral lineage  $l$  in state  $s$  at time  $t$ . The slope  
1444 parameter of lineage  $l$  in state  $s$ ,  $\beta_{ls}$ , was generated from a Student's  $t$   
1445 distribution with hyperparameters of the mean,  $\beta_l$ , and the standard deviation,  
1446  $\sigma_l$ . As the distribution generating  $\beta_{ls}$ , we used a Student's  $t$  distribution with six  
1447 degrees of freedom instead of a normal distribution to reduce the effects of  
1448 outlier values of  $\beta_{ls}$ . In the model, the linear estimator  $\mu_{.st}$ , consisting of the  
1449 intercept  $\alpha_{.s}$  and the slope  $\beta_{.s}$ , was converted to the simplex  $\theta_{.st}$ , which  
1450 represented the probability of occurrence of each viral lineage at time  $t$  in state  
1451  $s$ , based on the softmax link function defined as:

$$\text{softmax}(x) = \frac{\exp(x)}{\sum_i \exp(x_i)}$$

1452  $y_{lst}$  is generated from  $\theta_{.st}$  and the total count of all lineages at time  $t$  in state  $s$   
1453 according to a multinomial distribution.

1454 The relative  $R_e$  of each viral lineage in each county ( $r_{ls}$ ) was calculated  
1455 according to the slope parameter  $\beta_{ls}$  as:

$$r_{ls} = \exp(\gamma\beta_{ls})$$

1456 where  $\gamma$  is the average viral generation time (2.1 days)  
1457 ([http://sonorouschocolate.com/covid19/index.php?title=Estimating\\_Generation\\_](http://sonorouschocolate.com/covid19/index.php?title=Estimating_Generation_Time_Of_Omicron)  
1458 [Time\\_Of\\_Omicron](http://sonorouschocolate.com/covid19/index.php?title=Estimating_Generation_Time_Of_Omicron)). Similarly, the global average relative  $R_e$  of each viral lineage  
1459 was calculated according to the slope hyperparameter  $\beta_l$  as:

$$r_l = \exp(\gamma\beta_l)$$

1460 For parameter estimation, the intercept and slope parameters of the BA.2 variant  
1461 were fixed at 0. Consequently, the relative  $R_e$  of BA.2 was fixed at 1, and those  
1462 of the other lineages were estimated relative to that of BA.2.

1463 Parameter estimation was performed via the MCMC approach  
1464 implemented in CmdStan v2.28.1 (<https://mc-stan.org>) with CmdStanr v0.4.0  
1465 (<https://mc-stan.org/cmdstanr/>). Noninformative priors were set for all  
1466 parameters. Four independent MCMC chains were run with 1,000 and 2,000  
1467 steps in the warmup and sampling iterations, respectively. We confirmed that all  
1468 estimated parameters showed <1.01 R-hat convergence diagnostic values and  
1469 >200 effective sampling size values, indicating that the MCMC runs were  
1470 successfully convergent. The above analyses were performed in R v4.1.3  
1471 (<https://www.r-project.org/>). Information on the relative  $R_e$  estimated in the  
1472 present study is summarized in **Table S1**.  
1473



## 1474 **Plasmid construction**

1475 Plasmids expressing the codon-optimized SARS-CoV-2 S proteins of B.1.1 (the  
1476 parental D614G-bearing variant), BA.2 and BA.5 were prepared in our previous  
1477 studies (Kimura *et al.*, 2022a; Ozono *et al.*, 2021; Saito *et al.*, 2022; Suzuki *et al.*,  
1478 2022; Yamasoba *et al.*, 2022b). Plasmids expressing the codon-optimized S  
1479 proteins of BA.2.75 and the BA.2 S-based derivatives were generated by  
1480 site-directed overlap extension PCR using the primers listed in **Table S3**. The  
1481 resulting PCR fragment was digested with KpnI and NotI and inserted into the  
1482 corresponding site of the pCAGGS vector (Niwa *et al.*, 1991). Nucleotide  
1483 sequences were determined by DNA sequencing services (Eurofins), and the  
1484 sequence data were analyzed by Sequencher v5.1 software (Gene Codes  
1485 Corporation).

1486

## 1487 **Neutralization assay**

1488 Pseudoviruses were prepared as previously described (Kimura *et al.*, 2022a;  
1489 Kimura *et al.*, 2022b; Kimura *et al.*, 2022c; Motozono *et al.*, 2021; Uriu *et al.*,  
1490 2022; Uriu *et al.*, 2021; Yamasoba *et al.*, 2022a; Yamasoba *et al.*, 2022b;  
1491 Yamasoba *et al.*, 2022c). Briefly, lentivirus (HIV-1)-based, luciferase-expressing  
1492 reporter viruses were pseudotyped with the SARS-CoV-2 S proteins. HEK293T  
1493 cells (1,000,000 cells) were cotransfected with 1 µg psPAX2-IN/HiBiT (Ozono *et al.*,  
1494 2020), 1 µg pWPI-Luc2 (Ozono *et al.*, 2020), and 500 ng plasmids  
1495 expressing parental S or its derivatives using PEI Max (Polysciences, Cat#  
1496 24765-1) according to the manufacturer's protocol. Two days posttransfection,  
1497 the culture supernatants were harvested and centrifuged. The pseudoviruses  
1498 were stored at -80°C until use.

1499 Neutralization assay (**Figure 2**) was prepared as previously described  
1500 (Kimura *et al.*, 2022a; Kimura *et al.*, 2022b; Kimura *et al.*, 2022c; Saito *et al.*,  
1501 2022; Uriu *et al.*, 2022; Uriu *et al.*, 2021; Yamasoba *et al.*, 2022a; Yamasoba *et al.*,  
1502 2022b; Yamasoba *et al.*, 2022c). Briefly, the SARS-CoV-2 S pseudoviruses  
1503 (counting ~20,000 relative light units) were incubated with serially diluted  
1504 (120-fold to 87,480-fold dilution at the final concentration) heat-inactivated sera  
1505 at 37°C for 1 hour. Pseudoviruses without sera were included as controls. Then,  
1506 a 40 µl mixture of pseudovirus and serum/antibody was added to  
1507 HOS-ACE2/TMPRSS2 cells (10,000 cells/50 µl) in a 96-well white plate. At 2  
1508 d.p.i., the infected cells were lysed with a One-Glo luciferase assay system  
1509 (Promega, Cat# E6130) or a Bright-Glo luciferase assay system (Promega, Cat#  
1510 E2650), and the luminescent signal was measured using a GloMax explorer  
1511 multimode microplate reader 3500 (Promega) or CentroXS3 (Berthold  
1512 Technologies). The assay of each serum was performed in triplicate, and the  
1513 50% neutralization titer (NT<sub>50</sub>) was calculated using Prism 9 software v9.1.1  
1514 (GraphPad Software).

1515

# **Airway organoids**

1517 Airway organoids (AO) model was generated according to our previous report  
1518 (Sano *et al.*, 2022). Briefly, normal human bronchial epithelial cells (NHBE, Cat#  
1519 CC-2540, Lonza) were used to generate AO. NHBE were suspended in 10  
1520 mg/ml cold Matrigel growth factor reduced basement membrane matrix  
1521 (Corning). 50 µl of cell suspension was solidified on pre-warmed cell-culture  
1522 treated multi-dishes (24-well plates; Thermo Fisher Scientific) at 37 °C for 10  
1523 min, and then 500 µl of expansion medium was added to each well. AO were  
1524 cultured with AO expansion medium for 10 days. To mature the AO, expanded  
1525 AO were cultured with AO differentiation medium for 5 days. In experiments  
1526 evaluating the antiviral drugs (see “Antiviral drug assay using SARS-CoV-2  
1527 clinical isolates and AO” section below), AO were dissociated into single cells,  
1528 and then were seeded into 96-well plates.

1529

# **SARS-CoV-2 preparation and titration**

1531 The working virus stocks of SARS-CoV-2 were prepared and titrated as  
1532 previously described (Kimura *et al.*, 2022b; Kimura *et al.*, 2022c; Meng *et al.*,  
1533 2022; Motozono *et al.*, 2021; Saito *et al.*, 2022; Suzuki *et al.*, 2022; Yamasoba *et al.*,  
1534 2022b). In this study, clinical isolates of B.1.1 (strain TKYE610670; GISAID  
1535 ID: EPI\_ISL\_479681) (Suzuki *et al.*, 2022), Delta (B.1.617.2, strain TKYTK1734;  
1536 GISAID ID: EPI\_ISL\_2378732) (Saito *et al.*, 2022), BA.2 (strain TY40-385;  
1537 GISAID ID: EPI\_ISL\_9595859) (Kimura *et al.*, 2022c) and BA.5 (strain  
1538 TKYS14631; GISAID ID: EPI\_ISL\_12812500) (Tamura *et al.*, 2022), and  
1539 BA.2.75 (strain TY41-716; GISAID ID: EPI\_ISL\_13969765) were used. In brief,  
1540 20 µl of the seed virus was inoculated into VeroE6/TMPRSS2 cells (5,000,000  
1541 cells in a T-75 flask). One h.p.i., the culture medium was replaced with DMEM  
1542 (low glucose) (Wako, Cat# 041-29775) containing 2% FBS and 1% PS. At 3  
1543 d.p.i., the culture medium was harvested and centrifuged, and the supernatants  
1544 were collected as the working virus stock.

1545 The titer of the prepared working virus was measured as the 50%  
1546 tissue culture infectious dose (TCID<sub>50</sub>). Briefly, one day before infection,  
1547 VeroE6/TMPRSS2 cells (10,000 cells) were seeded into a 96-well plate. Serially  
1548 diluted virus stocks were inoculated into the cells and incubated at 37°C for 4  
1549 days. The cells were observed under microscopy to judge the CPE appearance.  
1550 The value of TCID<sub>50</sub>/ml was calculated with the Reed–Muench method (Reed  
1551 and Muench, 1938).

1552 To verify the sequences of SARS-CoV-2 working viruses, viral RNA  
1553 was extracted from the working viruses using a QIAamp viral RNA mini kit  
1554 (Qiagen, Cat# 52906) and viral genome sequences were analyzed as described  
1555 above (see "Viral genome sequencing" section). Information on the unexpected

substitutions detected is summarized in **Table S4**, and the raw data are deposited in the GitHub repository ([https://github.com/TheSatoLab/Omicron\\_BA.2.75](https://github.com/TheSatoLab/Omicron_BA.2.75)).

#### **Antiviral drug assay using SARS-CoV-2 clinical isolates and AO**

Antiviral drug assay (**Table 1 and Figure S2A**) was performed as previously described (Meng *et al.*, 2022). Briefly, one day before infection, AO (10,000 cells) was dissociated, and then seeded into a 96-well plate. The cells were infected with either B.1.1, BA.2, BA.5 or BA.2.75 isolate (100 TCID<sub>50</sub>) at 37°C for 2 hours. The cells were washed with DMEM and cultured in DMEM supplemented with 10% FCS, 1% PS and the serially diluted Remdesivir (Clinisciences, Cat# A17170), EIDD-1931 (an active metabolite of Molnupiravir; Cell Signalling Technology, Cat# 81178S), or Nirmatrelvir (PF-07321332; MedChemExpress, Cat# HY-138687). At 24 hours after infection, the culture supernatants were collected, and viral RNA was quantified using RT-qPCR (see “RT-qPCR” section below). The assay of each compound was performed in quadruplicate, and the 50% effective concentration (EC<sub>50</sub>) was calculated using Prism 9 software v9.1.1 (GraphPad Software).

#### **Cytotoxicity assay**

The cytotoxicity of Remdesivir, EIDD-1931 or Nirmatrelvir (**Figure S2B**) was performed as previously described (Meng *et al.*, 2022). Briefly, one day before the assay, AO (10,000 cells) was dissociated and then seeded into a 96-well plate. The cells were cultured with the serially diluted antiviral drugs for 24 hours. The cell counting kit-8 (Dojindo, Cat# CK04-11) solution (10 µl) was added to each well, and the cells were incubated at 37°C for 90 min. Absorbance was measured at 450 nm using the Multiskan FC (Thermo Fisher Scientific). The assay of each compound was performed in quadruplicate, and the 50% cytotoxic concentration (CC<sub>50</sub>) was calculated using Prism 9 software v9.1.1 (GraphPad Software).

#### **Pseudovirus infection**

Pseudovirus infection (**Figure 3A**) was performed as previously described (Ferreira *et al.*, 2021; Kimura *et al.*, 2022a; Kimura *et al.*, 2022b; Kimura *et al.*, 2022c; Motozono *et al.*, 2021; Uriu *et al.*, 2022; Uriu *et al.*, 2021; Yamasoba *et al.*, 2022a; Yamasoba *et al.*, 2022b; Yamasoba *et al.*, 2022c). Briefly, the amount of pseudoviruses prepared was quantified by the HiBiT assay using Nano Glo HiBiT lytic detection system (Promega, Cat# N3040) as previously described (Ozono *et al.*, 2021; Ozono *et al.*, 2020), and the same amount of pseudoviruses (normalized to the HiBiT value, which indicates the amount of p24 HIV-1 antigen) was inoculated into HOS-ACE2/TMPRSS2 cells,

HEK293-ACE2 cells or HEK293-ACE2/TMPRSS2 and viral infectivity was measured as described above (see “Neutralization assay” section). To analyze the effect of TMPRSS2 for pseudovirus infectivity (**Figure S3A**), the fold change of the values of HEK293-ACE2/TMPRSS2 to HEK293-ACE2 was calculated.

### Yeast surface display

Yeast surface display (**Figure 3B**) was performed as previously described (Dejnirattisai *et al.*, 2022; Kimura *et al.*, 2022a; Kimura *et al.*, 2022b; Kimura *et al.*, 2022c; Motozono *et al.*, 2021; Yamasoba *et al.*, 2022b; Zahradnik *et al.*, 2021b). Briefly, the RBD genes [“construct 3” in (Zahradnik *et al.*, 2021b), covering residues 330–528] in pJYDC1 plasmid were cloned by restriction enzyme-free cloning and transformed into the EBY100 *Saccharomyces cerevisiae*. Primers are listed in **Table S3**. The expression media 1/9 (Zahradnik *et al.*, 2021a) was inoculated (OD 1) by overnight (220 rpm, 30°C, SD-CAA media) grown culture and cultivated for 24 hours at 20°C. The media was supplemented by 10 mM DMSO solubilized bilirubin (Sigma-Aldrich, Cat# 14370-1G) for expression co-cultivation labeling (pJYDC1, eUnaG2 reporter holo-form formation, green/yellow fluorescence (Ex. 498 nm, Em. 527 nm). Cells (100 ul aliquots) were collected by centrifugation (3000 g, 3 minutes), washed in ice-cold PBSB buffer (PBS with 1 g/L BSA), and resuspended in an analysis solution with a series of CF®640R succinimidyl ester labeled (Biotium, USA, Cat# 92108) ACE2 peptidase domain (residues 18–740) concentrations. The reaction volume was adjusted (1–100 ml) to avoid the ligand depletion effect, and the suspension was incubated overnight in a rotator shaker (10 rpm, 4°C). Incubated samples were washed by PBSB buffer, transferred into 96 well plates (Thermo, USA, Nunc, Cat# 268200), and analyzed by the CytoFLEX S Flow Cytometer (Beckman Coulter, USA, Cat#. N0-V4-B2-Y4) with the gating strategy described previously (Zahradnik *et al.*, 2021b). The eUnaG2 signals were compensated by the instrument CytExpert software (Beckman Coulter). The mean binding signal (FL4-A) values of RBD expressing cells, subtracted by signals of non-expressing populations, were subjected for the determination of binding constant  $K_D$ ,  $Y_D$  by non-cooperative Hill equation fitted by nonlinear least-squares regression using Python v3.7 fitted together with two additional parameters describing titration curve (Zahradnik *et al.*, 2021b).

### AlphaFold2

To generate the structure model of BA.2.75 S RBD (**Figures 3C, 3D and S3B**), the AlphaFold2 structural prediction was performed using ColabFold (Mirdita *et al.*, 2022) using the BA.2 S RBD template (PDB: 7UB0) (Stalls *et al.*, 2022). The MMseqs2 and HHsearch parameters were set as default. The models were manually inspected, and those exhibiting poor parameters and models that did

not adopt the classical RBD interface conformation were eliminated. The two highest score models were analyzed in detail. Three-dimensional visualization and analyses were performed using PyMOL v2.1.1 (Schrödinger, <https://pymol.org/2/>). In **Figure 3D**, the wild-type SARS-CoV-2 S RBD of the crystal structure of RBD-ACE2 complex (PDB:6M17) (Yan *et al.*, 2020) was replaced with the BA.2.75 S RBD structure generated by AlphaFold2.

#### **SARS-CoV-2 S-based fusion assay**

SARS-CoV-2 S-based fusion assay (**Figures 3E and 3F**) was performed as previously described (Kimura *et al.*, 2022b; Kimura *et al.*, 2022c; Motozono *et al.*, 2021; Saito *et al.*, 2022; Suzuki *et al.*, 2022; Yamasoba *et al.*, 2022b). Briefly, on day 1, effector cells (i.e., S-expressing cells) and target cells (Calu-3/DSP<sub>1-7</sub> cells) were prepared at a density of  $0.6\text{--}0.8 \times 10^6$  cells in a 6-well plate. On day 2, to prepare effector cells, HEK293 cells were cotransfected with the S expression plasmids (400 ng) and pDSP<sub>8-11</sub> (Kondo *et al.*, 2011) (400 ng) using TransIT-LT1 (Takara, Cat# MIR2300). On day 3 (24 hours posttransfection), 16,000 effector cells were detached and reseeded into 96-well black plates (PerkinElmer, Cat# 6005225), and target cells were reseeded at a density of 1,000,000 cells/2 ml/well in 6-well plates. On day 4 (48 hours posttransfection), target cells were incubated with EnduRen live cell substrate (Promega, Cat# E6481) for 3 hours and then detached, and 32,000 target cells were added to a 96-well plate with effector cells. *Renilla* luciferase activity was measured at the indicated time points using Centro XS3 LB960 (Berthold Technologies). To measure the surface expression level of S protein, effector cells were stained with rabbit anti-SARS-CoV-2 S S1/S2 polyclonal antibody (Thermo Fisher Scientific, Cat# PA5-112048, 1:100). Normal rabbit IgG (SouthernBiotech, Cat# 0111-01, 1:100) was used as negative controls, and APC-conjugated goat anti-rabbit IgG polyclonal antibody (Jackson ImmunoResearch, Cat# 111-136-144, 1:50) was used as a secondary antibody. Surface expression level of S proteins (**Figure 3E**) was measured using FACS Canto II (BD Biosciences) and the data were analyzed using FlowJo software v10.7.1 (BD Biosciences). To calculate fusion activity, *Renilla* luciferase activity was normalized to the MFI of surface S proteins. The normalized value (i.e., *Renilla* luciferase activity per the surface S MFI) is shown as fusion activity.

#### **AO-ALI model**

AO-ALI model (**Figure 4D**) was generated according to our previous report (Sano *et al.*, 2022). To generate AO-ALI, expanding AO were dissociated into single cells, and then were seeded into Transwell inserts (Corning) in a 24-well plate. To promote their maturation, AO-ALI were cultured with AO differentiation medium for 5 days. AO-ALI were infected with SARS-CoV-2 from the apical side.



1679

## 1680 **Preparation of human airway and alveolar epithelial cells from human iPSC**

1681 The air-liquid interface culture of airway and alveolar epithelial cells (**Figures 4E**  
1682 **and 4F**) were differentiated from human iPSC-derived lung progenitor cells as  
1683 previously described (Gotoh et al., 2014; Kimura et al., 2022c; Konishi et al.,  
1684 2016; Tamura et al., 2022; Yamamoto et al., 2017). Briefly, lung progenitor cells  
1685 were stepwise induced from human iPSCs referring a 21-days and 4-steps  
1686 protocol (Yamamoto et al., 2017). At day 21, lung progenitor cells were isolated  
1687 with specific surface antigen carboxypeptidase M and seeded onto upper  
1688 chamber of 24-well Cell Culture Insert (Falcon, #353104), followed by 28-day  
1689 and 7-day differentiation of airway and alveolar epithelial cells, respectively.  
1690 Alveolar differentiation medium supplemented with dexamethasone  
1691 (Sigma-Aldrich, Cat# D4902), KGF (PeproTech, Cat# 100-19), 8-Br-cAMP  
1692 (Biolog, Cat# B007), 3-Isobutyl 1-methylxanthine (IBMX) (FUJIFILM Wako, Cat#  
1693 095-03413), CHIR99021 (Axon Medchem, Cat# 1386), and SB431542  
1694 (FUJIFILM Wako, Cat# 198-16543) was used for induction of alveolar epithelial  
1695 cells. PneumaCult ALI (STEMCELL Technologies, Cat# ST-05001)  
1696 supplemented with heparin (Nacalai Tesque, Cat# 17513-96) and Y-27632 (LC  
1697 Laboratories, Cat# Y-5301) hydrocortisone (Sigma-Aldrich, Cat# H0135) was  
1698 used for induction of airway epithelial cells.

1699

## 1700 **Airway-on-a-chips**

1701 Airway-on-a-chips (**Figure S3C**) were prepared as previously described  
1702 (Hashimoto et al., 2022). Human lung microvascular endothelial cells  
1703 (HMVEC-L) were obtained from Lonza (Cat# CC-2527) and cultured with  
1704 EGM-2-MV medium (Lonza, Cat# CC-3202). To prepare the airway-on-a-chip,  
1705 first, the bottom channel of a polydimethylsiloxane (PDMS) device was  
1706 pre-coated with fibronectin (3 µg/ml, Sigma, Cat# F1141). The microfluidic  
1707 device was generated according to our previous report (Deguchi et al., 2021).  
1708 HMVEC-L were suspended at 5,000,000 cells/ml in EGM2-MV medium. Then,  
1709 10 µl suspension medium was injected into the fibronectin-coated bottom  
1710 channel of the PDMS device. Then, the PDMS device was turned upside down  
1711 and incubated for 1 h. After 1 hour, the device was turned over, and the  
1712 EGM2-MV medium was added into the bottom channel. After 4 days, AO were  
1713 dissociated and seeded into the top channel. The AO was generated according  
1714 to our previous report (Sano et al., 2022). AO were dissociated into single cells  
1715 and then suspended at 5,000,000 cells/ml in the AO differentiation medium. Ten  
1716 microliter suspension medium was injected into the top channel. After 1 hour, the  
1717 AO differentiation medium was added to the top channel. In the infection  
1718 experiments (**Figures 4G–4I**), the AO differentiation medium containing either  
1719 B.1.1, Delta, BA.2, BA.5 or BA.2.75 isolate (500 TCID<sub>50</sub>) was inoculated from the



1720 top channel (**Figure S3C**). At 2 h.p.i., the top and bottom channels were washed  
1721 and cultured with AO differentiation and EGM2-MV medium, respectively. The  
1722 culture supernatants were collected, and viral RNA was quantified using  
1723 RT-qPCR (see “RT-qPCR” section above).

1724

#### 1725 **Microfluidic device**

1726 The microfluidic device was generated according to our previous report (Deguchi  
1727 *et al.*, 2021). Briefly, the microfluidic device consisted of two layers of  
1728 microchannels separated by a semipermeable membrane. The microchannel  
1729 layers were fabricated from PDMS using a soft lithographic method. PDMS  
1730 prepolymer (SYLGARD 184, Dow Corning) at a base to curing agent ratio of  
1731 10:1 was cast against a mold composed of SU-8 2150 (MicroChem) patterns  
1732 formed on a silicon wafer. The cross-sectional size of the microchannels was 1  
1733 mm in width and 330  $\mu$ m in height. To introduce solutions into the microchannels,  
1734 access holes were punched through the PDMS using a 6-mm biopsy punch (Kai  
1735 Corporation). Two PDMS layers were bonded to a PET membrane containing  
1736 3.0  $\mu$ m pores (Cat# 353091, Falcon) using a thin layer of liquid PDMS  
1737 prepolymer as the mortar. PDMS prepolymer was spin-coated (4000 rpm for 60  
1738 sec) onto a glass slide. Subsequently, both the top and bottom channel layers  
1739 were placed on the glass slide to transfer the thin layer of PDMS prepolymer  
1740 onto the embossed PDMS surfaces. The membrane was then placed onto the  
1741 bottom layer and sandwiched with the top layer. The combined layers were left  
1742 at room temperature for 1 day to remove air bubbles and then placed in an oven  
1743 at 60°C overnight to cure the PDMS glue. The PDMS devices were sterilized by  
1744 placing them under UV light for 1 hour before the cell culture.

1745

#### 1746 **SARS-CoV-2 infection**

1747 One day before infection, Vero cells (10,000 cells), VeroE6/TMPRSS2 cells  
1748 (10,000 cells), and HEK293-ACE2/TMPRSS2 cells were seeded into a 96-well  
1749 plate. SARS-CoV-2 [1,000 TCID<sub>50</sub> for Vero cells (**Figure 4A**); 100 TCID<sub>50</sub> for  
1750 VeroE6/TMPRSS2 cells (**Figure 4B**) and HEK293-ACE2/TMPRSS2 cells  
1751 (**Figure 4C**)] was inoculated and incubated at 37°C for 1 hour. The infected cells  
1752 were washed, and 180  $\mu$ l culture medium was added. The culture supernatant  
1753 (10  $\mu$ l) was harvested at the indicated timepoints and used for RT-qPCR to  
1754 quantify the viral RNA copy number (see “RT-qPCR” section below). In the  
1755 infection experiments using human iPSC-derived airway and alveolar epithelial  
1756 cells (**Figures 4E and 4F**), working viruses were diluted with Opti-MEM (Thermo  
1757 Fisher Scientific, 11058021). The diluted viruses (1,000 TCID<sub>50</sub> in 100  $\mu$ l) were  
1758 inoculated onto the apical side of the culture and incubated at 37°C for 1 hour.  
1759 The inoculated viruses were removed and washed twice with Opti-MEM. To  
1760 collect the viruses, 100  $\mu$ l Opti-MEM was applied onto the apical side of the

1761 culture and incubated at 37°C for 10 minutes. The Opti-MEM was collected  
1762 and used for RT-qPCR to quantify the viral RNA copy number (see “RT-qPCR”  
1763 section below). The infection experiments using an airway-on-a-chip system  
1764 (**Figures 4G–4I**) was performed as described above (see “Airway-on-a-chips”  
1765 section).

#### 1766 1767 **RT-qPCR**

1768 RT-qPCR was performed as previously described (Kimura *et al.*, 2022b; Kimura  
1769 *et al.*, 2022c; Meng *et al.*, 2022; Motozono *et al.*, 2021; Saito *et al.*, 2022; Suzuki  
1770 *et al.*, 2022; Yamasoba *et al.*, 2022b). Briefly, 5 µl culture supernatant was mixed  
1771 with 5 µl 2 × RNA lysis buffer [2% Triton X-100 (Nacalai Tesque, Cat# 35501-15),  
1772 50 mM KCl, 100 mM Tris-HCl (pH 7.4), 40% glycerol, 0.8 U/µl recombinant  
1773 RNase inhibitor (Takara, Cat# 2313B)] and incubated at room temperature for  
1774 10 min. RNase-free water (90 µl) was added, and the diluted sample (2.5 µl) was  
1775 used as the template for real-time RT-PCR performed according to the  
1776 manufacturer's protocol using One Step TB Green PrimeScript PLUS RT-PCR  
1777 kit (Takara, Cat# RR096A) and the following primers: Forward *N*, 5'-AGC CTC  
1778 TTC TCG TTC CTC ATC AC-3'; and Reverse *N*, 5'-CCG CCA TTG CCA GCC  
1779 ATT C-3'. The viral RNA copy number was standardized with a SARS-CoV-2  
1780 direct detection RT-qPCR kit (Takara, Cat# RC300A). Fluorescent signals were  
1781 acquired using QuantStudio 1 Real-Time PCR system (Thermo Fisher Scientific),  
1782 QuantStudio 3 Real-Time PCR system (Thermo Fisher Scientific), QuantStudio  
1783 5 Real-Time PCR system (Thermo Fisher Scientific), CFX Connect Real-Time  
1784 PCR Detection system (Bio-Rad), Eco Real-Time PCR System (Illumina),  
1785 qTOWER3 G Real-Time System (Analytik Jena) Thermal Cycler Dice Real Time  
1786 System III (Takara) or 7500 Real-Time PCR System (Thermo Fisher Scientific).

#### 1787 1788 **Plaque assay**

1789 Plaque assay (**Figure 4J**) was performed as previously described (Kimura *et al.*,  
1790 2022b; Kimura *et al.*, 2022c; Suzuki *et al.*, 2022; Yamasoba *et al.*, 2022b).  
1791 Briefly, one day before infection, VeroE6/TMPRSS2 cells (100,000 cells) were  
1792 seeded into a 24-well plate and infected with SARS-CoV-2 (0.5, 5, 50 and 500  
1793 TCID<sub>50</sub>) at 37°C for 1 hour. Mounting solution containing 3% FBS and 1.5%  
1794 carboxymethyl cellulose (Wako, Cat# 039-01335) was overlaid, followed by  
1795 incubation at 37°C. At 3 d.p.i., the culture medium was removed, and the cells  
1796 were washed with PBS three times and fixed with 4% paraformaldehyde  
1797 phosphate (Nacalai Tesque, Cat# 09154-85). The fixed cells were washed with  
1798 tap water, dried, and stained with staining solution [0.1% methylene blue  
1799 (Nacalai Tesque, Cat# 22412-14) in water] for 30 minutes. The stained cells  
1800 were washed with tap water and dried, and the size of plaques was measured  
1801 using Fiji software v2.2.0 (ImageJ).

1802

# **Animal experiments**

1804 Animal experiments (**Figure 5**) were performed as previously described (Kimura  
1805 *et al.*, 2022b; Kimura *et al.*, 2022c; Saito *et al.*, 2022; Suzuki *et al.*, 2022; Tamura  
1806 *et al.*, 2022; Yamasoba *et al.*, 2022b). Syrian hamsters (male, 4 weeks old) were  
1807 purchased from Japan SLC Inc. (Shizuoka, Japan). For the virus infection  
1808 experiments, hamsters were euthanized by intramuscular injection of a mixture  
1809 of 0.15 mg/kg medetomidine hydrochloride (Domitor®, Nippon Zenyaku Kogyo),  
1810 2.0 mg/kg midazolam (Dormicum®, FUJIFILM Wako Chemicals) and 2.5 mg/kg  
1811 butorphanol (Vetorphale®, Meiji Seika Pharma) or 0.15 mg/kg medetomidine  
1812 hydrochloride, 4.0 mg/kg alphaxalone (Alfaxan®, Jurox) and 2.5 mg/kg  
1813 butorphanol. The Delta, BA.2, BA.5 and BA.2.75 (1,000 TCID<sub>50</sub> in 100 µl), or  
1814 saline (100 µl) were intranasally inoculated under anesthesia. Oral swabs were  
1815 collected at indicated timepoints. Body weight was recorded daily by 7 d.p.i.  
1816 Enhanced pause (Penh), the ratio of time to peak expiratory flow relative to the  
1817 total expiratory time (Rpef), and BPM were measured every day until 7 d.p.i.  
1818 (see below). Subcutaneous oxygen saturation (SpO<sub>2</sub>, see below) was monitored  
1819 at 0, 1, 3, 5, and 7 d.p.i. Lung tissues were anatomically collected at 2 and 5 d.p.i.  
1820 Viral RNA load in the oral swabs and respiratory tissues were determined by  
1821 RT-qPCR. These tissues were also used for IHC and histopathological analyses  
1822 (see below).

1823

# **Lung function test**

1825 Lung function test (**Figure 5A**) was routinely performed as previously described  
1826 (Kimura *et al.*, 2022b; Kimura *et al.*, 2022c; Saito *et al.*, 2022; Suzuki *et al.*,  
1827 2022; Tamura *et al.*, 2022; Yamasoba *et al.*, 2022b). The three respiratory  
1828 parameters (Penh, Rpef and BPM) were measured by using a whole-body  
1829 plethysmography system (DSI) according to the manufacturer's instructions. In  
1830 brief, a hamster was placed in an unrestrained plethysmography chamber and  
1831 allowed to acclimatize for 30 seconds, then, data were acquired over a  
1832 2.5-minute period by using FinePointe Station and Review softwares  
1833 v2.9.2.12849 (STARR). The state of oxygenation was examined by measuring  
1834 SpO<sub>2</sub> using pulse oximeter, MouseOx PLUS (STARR). SpO<sub>2</sub> was measured by  
1835 attaching a measuring chip to the neck of hamsters sedated by 0.25 mg/kg  
1836 medetomidine hydrochloride.

1837

# **Immunohistochemistry**

1839 Immunohistochemistry (IHC) (**Figures 5D, S4A–S4C**) was performed as  
1840 previously described (Kimura *et al.*, 2022b; Kimura *et al.*, 2022c; Saito *et al.*,  
1841 2022; Suzuki *et al.*, 2022; Tamura *et al.*, 2022; Yamasoba *et al.*, 2022b) using an  
1842 Autostainer Link 48 (Dako). The deparaffinized sections were exposed to

EnVision FLEX target retrieval solution high pH (Agilent, Cat# K8004) for 20 minutes at 97°C to activate, and mouse anti-SARS-CoV-2 N monoclonal antibody (clone 1035111, R&D systems, Cat# MAB10474-SP, 1:400) was used as a primary antibody. The sections were sensitized using EnVision FLEX (Agilent) for 15 minutes and visualized by peroxidase-based enzymatic reaction with 3,3'-diaminobenzidine tetrahydrochloride (Dako, Cat# DM827) as substrate for 5 minutes. The N protein positivity (**Figures 5E, S4A and S4B**) was evaluated by certificated pathologists as previously described (Kimura *et al.*, 2022b; Kimura *et al.*, 2022c; Saito *et al.*, 2022; Suzuki *et al.*, 2022; Tamura *et al.*, 2022; Yamasoba *et al.*, 2022b). Images were incorporated as virtual slide by NDP.scan software v3.2.4 (Hamamatsu Photonics). The N-protein positivity was measured as the area using Fiji software v2.2.0 (ImageJ).

### H&E staining

H&E staining (**Figures 5F and S4D**) was performed as previously described (Kimura *et al.*, 2022b; Kimura *et al.*, 2022c; Saito *et al.*, 2022; Suzuki *et al.*, 2022; Tamura *et al.*, 2022; Yamasoba *et al.*, 2022b). Briefly, excised animal tissues were fixed with 10% formalin neutral buffer solution, and processed for paraffin embedding. The paraffin blocks were sectioned with 3 µm-thickness and then mounted on MAS-GP-coated glass slides (Matsunami Glass, Cat# S9901). H&E staining was performed according to a standard protocol.

### Histopathological scoring

Histopathological scoring (**Figure 5G**) was performed as previously described (Kimura *et al.*, 2022b; Kimura *et al.*, 2022c; Saito *et al.*, 2022; Suzuki *et al.*, 2022; Tamura *et al.*, 2022; Yamasoba *et al.*, 2022b). Pathological features including (i) bronchitis or bronchiolitis, (ii) hemorrhage with congestive edema, (iii) alveolar damage with epithelial apoptosis and macrophage infiltration, (iv) hyperplasia of type II pneumocytes, and (v) the area of the hyperplasia of large type II pneumocytes were evaluated by certified pathologists and the degree of these pathological findings were arbitrarily scored using four-tiered system as 0 (negative), 1 (weak), 2 (moderate), and 3 (severe). The "large type II pneumocytes" are the hyperplasia of type II pneumocytes exhibiting more than 10-µm-diameter nucleus. We described "large type II pneumocytes" as one of the remarkable histopathological features reacting SARS-CoV-2 infection in our previous studies (Kimura *et al.*, 2022b; Kimura *et al.*, 2022c; Saito *et al.*, 2022; Suzuki *et al.*, 2022; Tamura *et al.*, 2022; Yamasoba *et al.*, 2022b). Total histology score is the sum of these five indices.

To measure the inflammation area in the infected lungs (**Figures 5H and S4D**), four hamsters infected with each virus were sacrificed at 5 d.p.i., and all four right lung lobes, including upper (anterior/cranial), middle, lower

(posterior/caudal), and accessory lobes, were sectioned along with their bronchi. The tissue sections were stained by H&E, and the digital microscopic images were incorporated into virtual slides using NDP.scan software v3.2.4 (Hamamatsu Photonics). The inflammatory area including type II pneumocyte hyperplasia in the infected whole lungs was morphometrically analyzed using Fiji software v2.2.0 (ImageJ).

1890

## 1891 **QUANTIFICATION AND STATISTICAL ANALYSIS**

1892 Statistical significance was tested using a two-sided Mann–Whitney *U*-test, a  
1893 two-sided Student's *t*-test or a two-sided paired *t*-test unless otherwise noted.  
1894 The tests above were performed using Prism 9 software v9.1.1 (GraphPad  
1895 Software).

1896 In the time-course experiments (**Figures 3F, 4A–4H, 5A, 5B, and 5G**),  
1897 a multiple regression analysis including experimental conditions (i.e., the types  
1898 of infected viruses) as explanatory variables and timepoints as qualitative control  
1899 variables was performed to evaluate the difference between experimental  
1900 conditions thorough all timepoints. The initial time point was removed from the  
1901 analysis. *P* value was calculated by a two-sided Wald test. Subsequently,  
1902 familywise error rates (FWERs) were calculated by the Holm method. These  
1903 analyses were performed in R v4.1.2 (<https://www.r-project.org/>).

1904 In **Figures 5D, 5F and S4**, photographs shown are the representative  
1905 areas of at least two independent experiments by using four hamsters at each  
1906 timepoint.

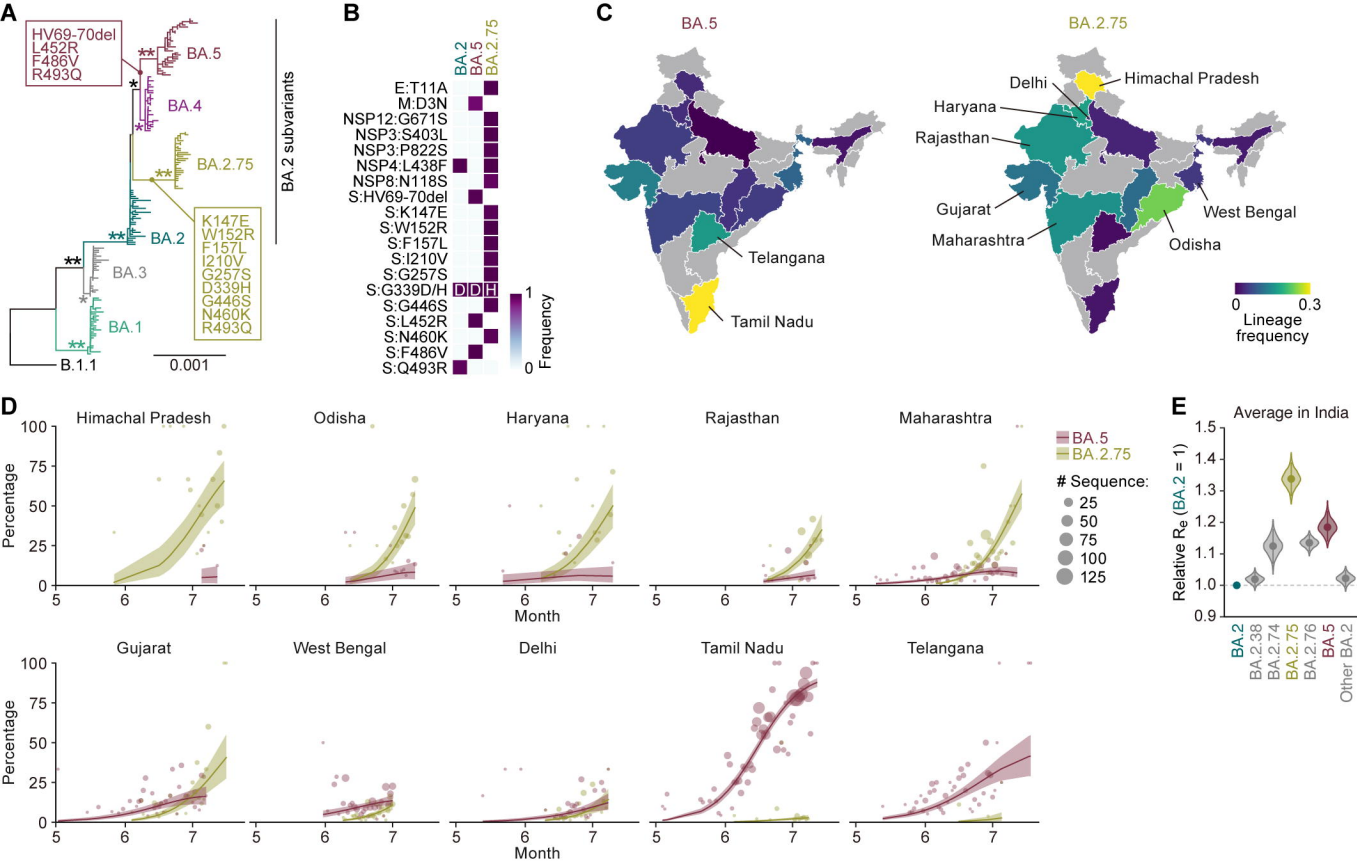



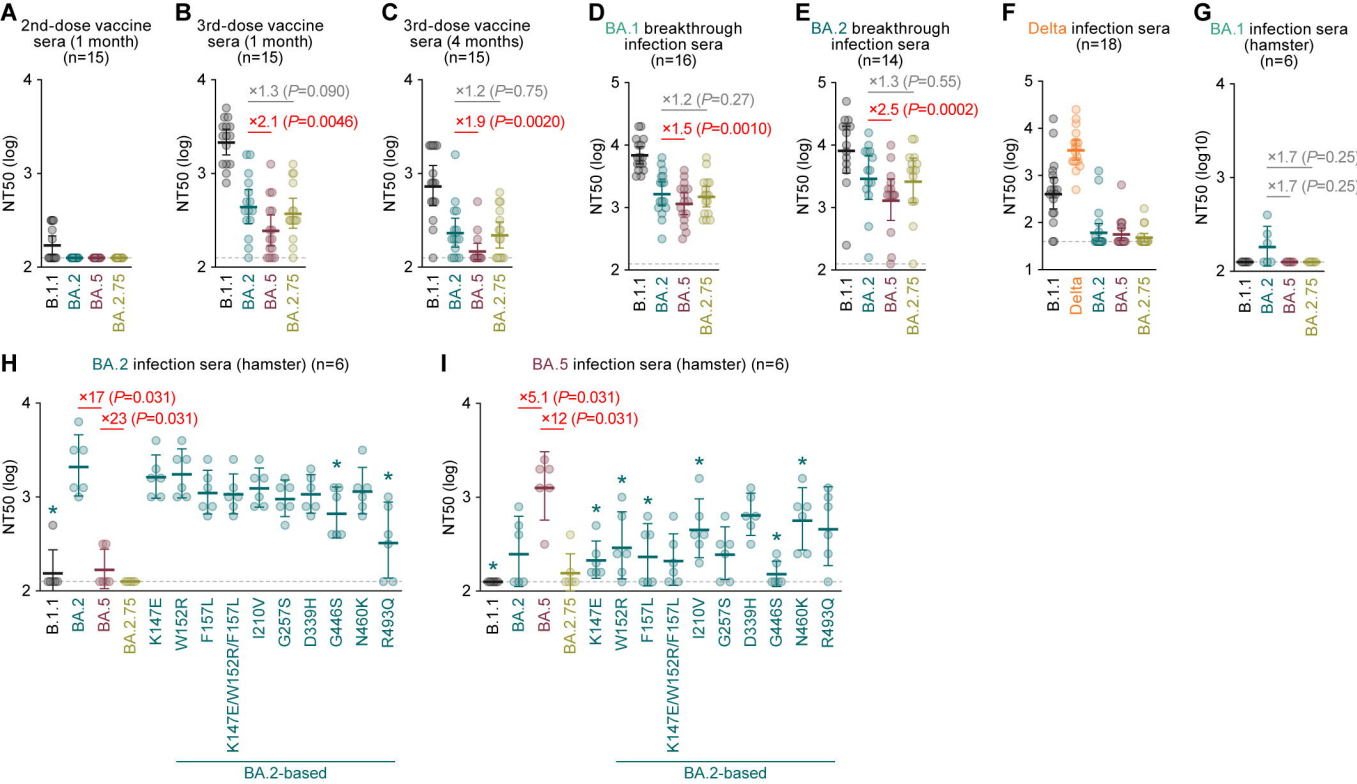

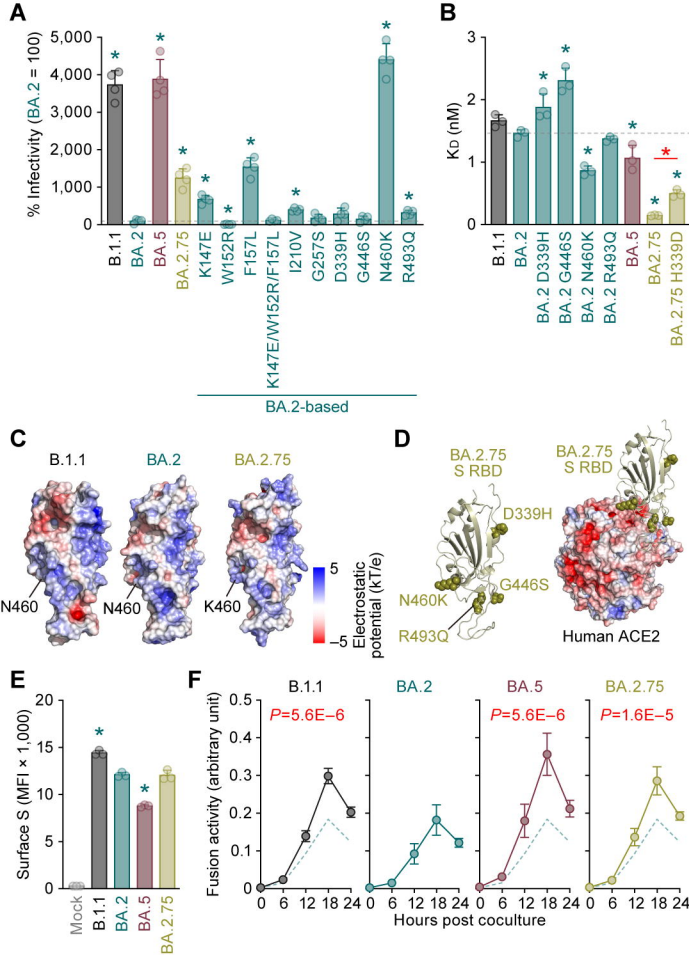

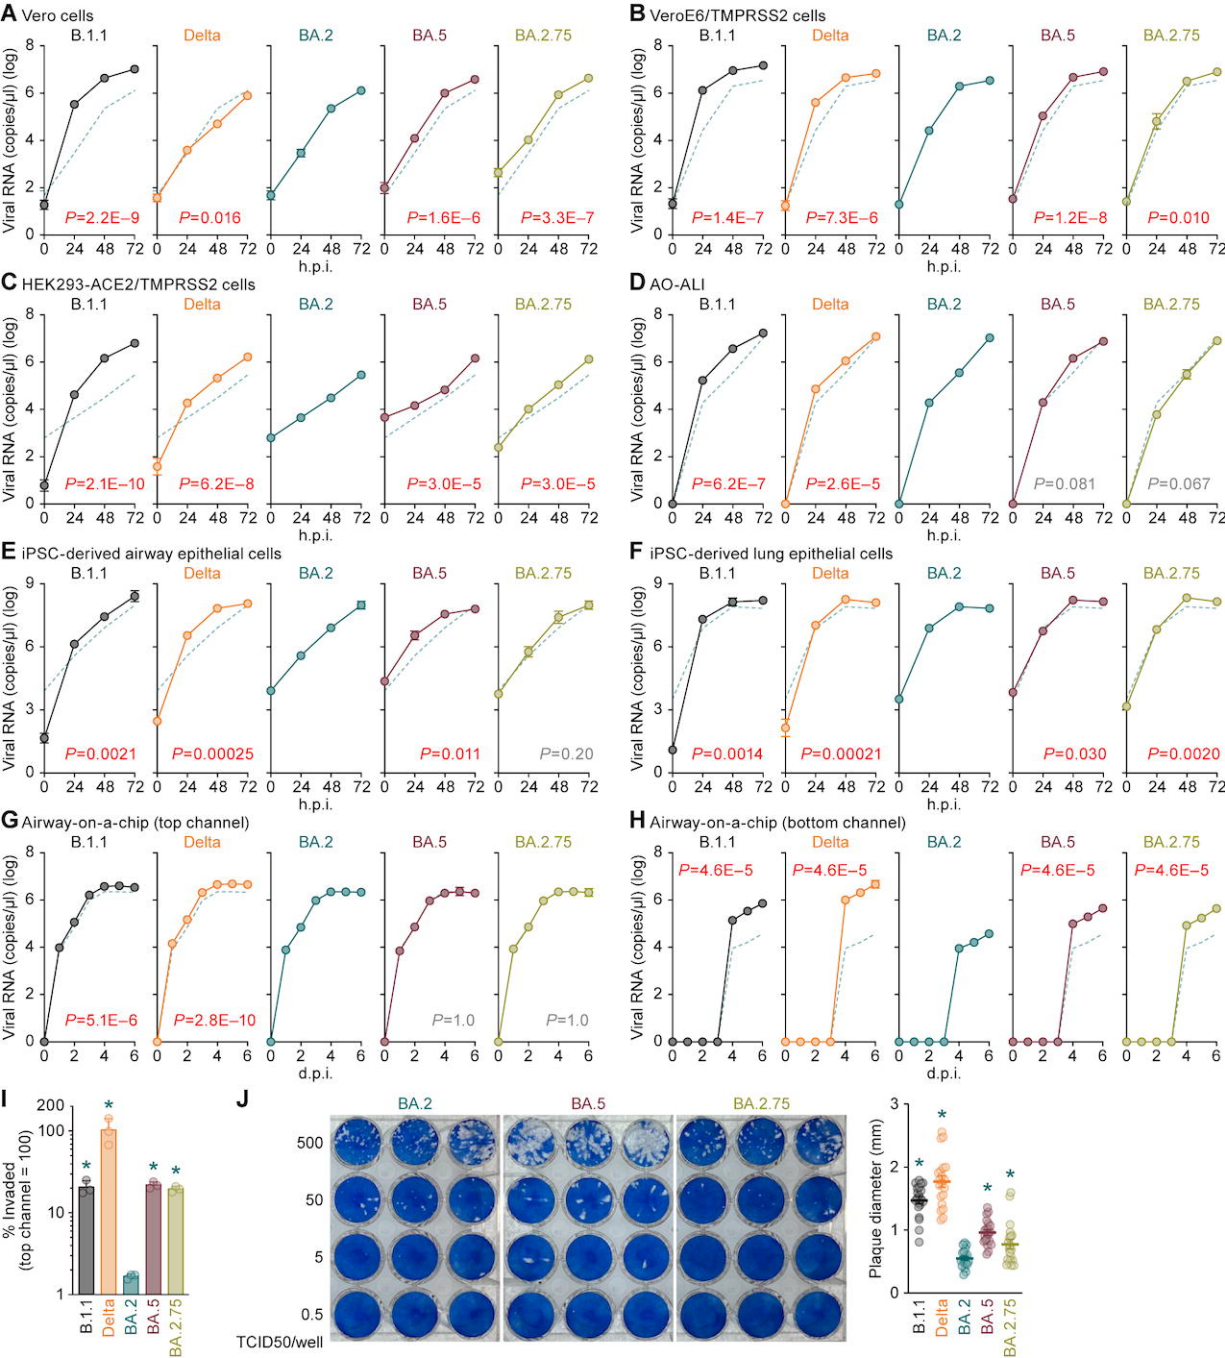

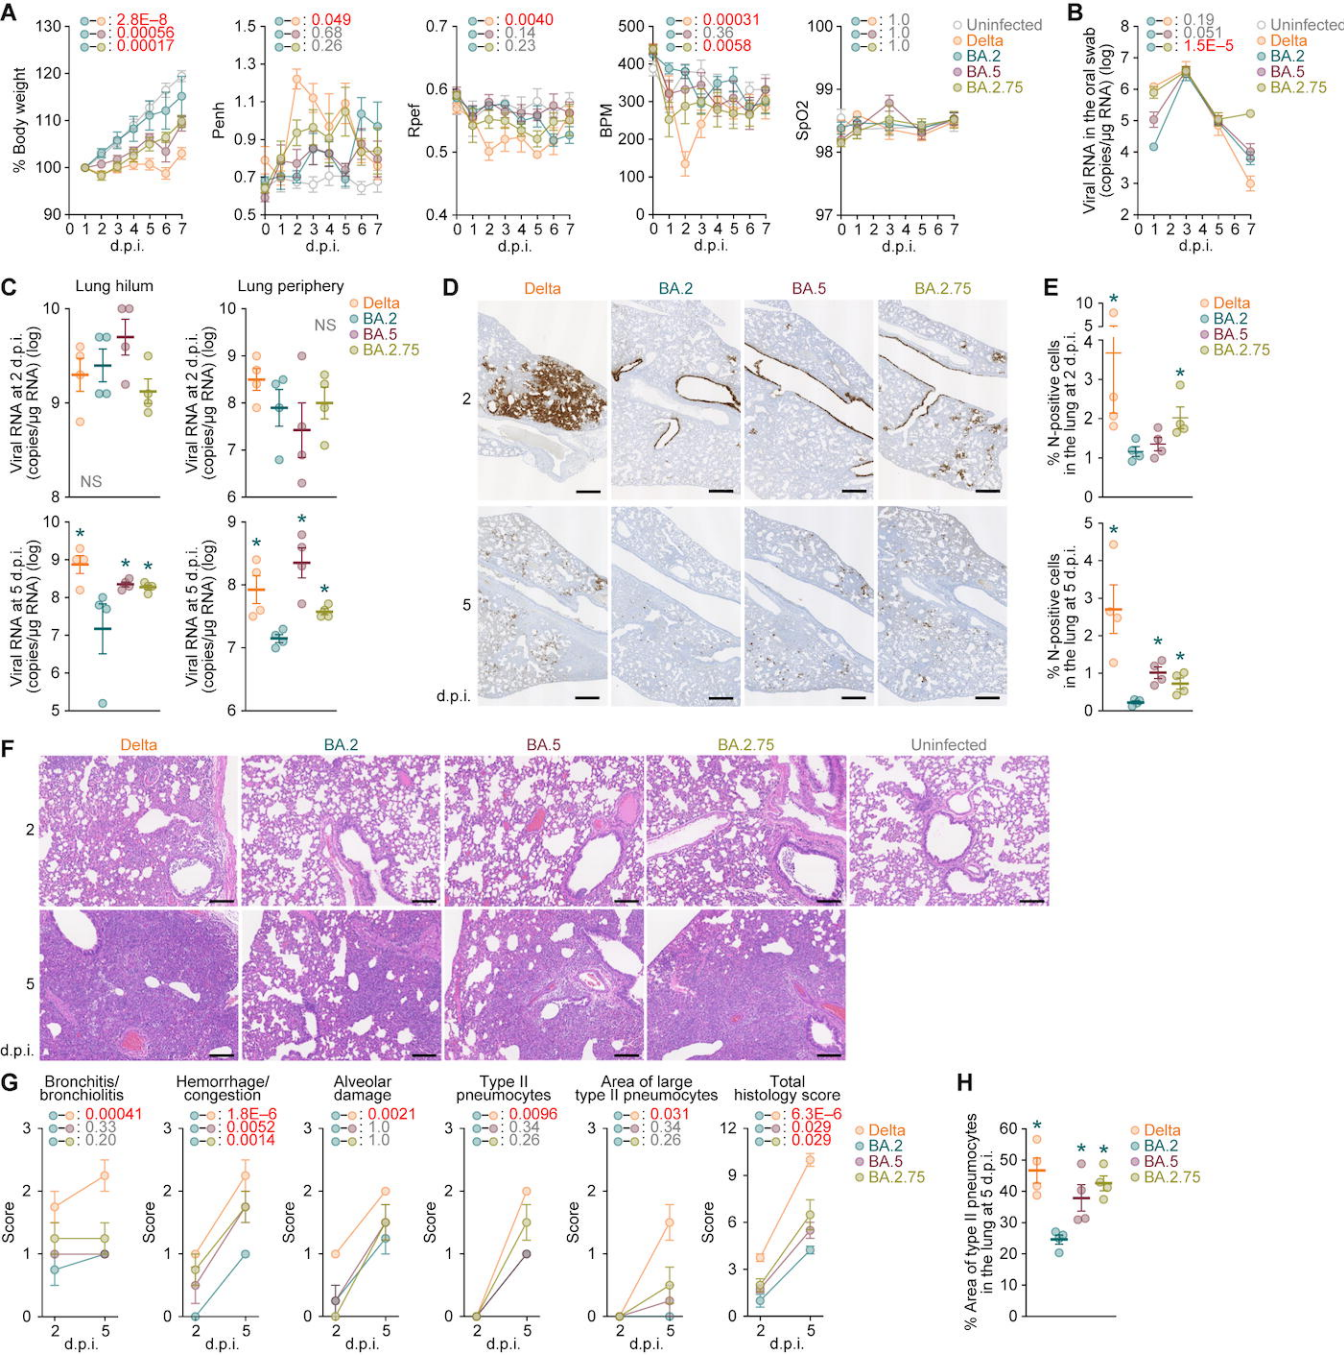

Source: https://www.biorxiv.org/content/10.1101/2022.08.07.503115v1.full.pdf
